1 **Title: Transcriptomic analyses with the progress of symbiosis in ‘crack-entry’ legume**  
2 ***Arachis hypogaea* highlight its contrast with ‘Infection thread’ adapted legumes**

3 **Authors:** Kanchan Karmakar<sup>1‡</sup>, Anindya Kundu<sup>1‡</sup>, Ahsan Z Rizvi<sup>2†</sup>, Emeric Dubois<sup>3</sup>, Dany  
4 Severac<sup>3</sup>, Pierre Czernic<sup>2</sup>, Fabienne Cartieaux<sup>2</sup> and Maitrayee DasGupta<sup>1\*</sup>

5 **Author information**

6 <sup>1</sup> Department of Biochemistry, University of Calcutta, Kolkata 700019, India

7 <sup>2</sup>LSTM, Univ. Montpellier, CIRAD, INRA, IRD, SupAgro, Montpellier, France

8 <sup>3</sup>Montpellier GenomiX (MGX), c/o Institut de Génomique Fonctionnelle, 141 rue de la cardonille,  
9 34094 Montpellier Cedex 05, France

10 <sup>†</sup>Present address: 112, INSERM U981, Bâtiment Médecine Moléculaire (B2M), Gustave  
11 Roussy, 114, rue Edouard Vaillant, 94805 Villejuif Cedex-France

12 <sup>‡</sup> Equal contribution

13

14 **\* Author for correspondence:**

15 Maitrayee DasGupta

16 Address: Department of Biochemistry, University of Calcutta,

17 35, Ballygunge Circular Road,

18 Kolkata-700019,

19 West Bengal, India

20 Phone No.: +91-33-2475-4680; Fax: +91-33-2476-4419

21 Email ID: [maitrayee\\_d@hotmail.com](mailto:maitrayee_d@hotmail.com)

22

23

24

25

26

## 27 ABSTRACT

28 In root-nodule symbiosis, rhizobial invasion and nodule organogenesis are host controlled. In  
29 most legumes, rhizobia enter through infection-threads and nodule primordium in the cortex is  
30 induced from distance. But in dalbergoid legumes like *Arachis hypogaea*, rhizobia directly invade  
31 cortical cells through epidermal cracks to generate the primordia. Herein we report the  
32 transcriptional dynamics with the progress of symbiosis in *A. hypogaea* by profiling the  
33 transcriptome at 1dpi: invasion; 4dpi: nodule primordia; 8dpi: spread of infection in nodule-like  
34 structure; 12dpi: immature nodules containing rod-shaped rhizobia; and 21dpi: mature nodules  
35 with spherical symbiosomes. Differentially expressed genes show clear transcriptional shifts at  
36 these stages. Expressions of putative orthologues of symbiotic genes in ‘crack-entry’  
37 legume *A.hypogaea* were compared with their expression in model legumes where rhizobia invade  
38 through infection-threads. The notable contrasting features were (i) absence of early induction of  
39 *NIN* and *NSP2*, (ii) insignificant expression of *VPY* and (iii) significantly high expression of  
40 *ERF1*, *bHLH476*, *EIN2* and divergent *PR-1* genes that produce CAPE peptides. Additionally,  
41 homologues for *RPG*, *SymCRK* and *DNF2* were absent in *A. hypogaea* genome and for *FLOT4*,  
42 *ROP6*, *RR9*, *NOOT*, and *SENI*, their symbiotic orthologues were not detectable. A molecular  
43 framework that may guide symbiosis in *A. hypogaea* is proposed.

44

45

46

47

48

49

50

51

52

53

54

55

56

57

## 58 INTRODUCTION

59 Nitrogen fixing root-nodule symbiosis (RNS) allows plants to house bacterial diazotrophs in an  
60 intracellular manner (Kistner and Parniske, 2002). RNS occurs in two major forms: legume–  
61 rhizobia (Fabaceae) and actinorhizal symbiosis (Fagaceae, Rosaceae, Cucurbitaceae)(Pawlowski  
62 and Bisseling, 1996). The Leguminosae (Fabaceae) is the third largest family of flowering plants  
63 and are agriculturally and economically important, being second only to the Poaceae (e.g. cereals).  
64 This economic importance of the Leguminosae is mainly due to RNS that allows the plant to grow  
65 well and produce protein rich seeds in the absence of nitrogen fertilizer in soils.

66 The establishment of RNS involves rhizobial invasion in the root epidermis and nodule  
67 organogenesis in the root cortical cells. The most common invasion strategy is through root hair  
68 curling and infection thread (IT) formation where the nodule primordia are induced from a  
69 distance (Sprent and James, 2007). Invasion through IT is adapted mostly by temperate legumes  
70 e.g. *Vicia sp.*, *Trifolium sp.*, *Pisum sp.*. Model legumes like *Lotus japonicus* and *Medicago*  
71 *truncatula* also undertake IT mediated rhizobial invasion (Geurts and Bisseling, 2002; Oldroyd  
72 and Downie, 2004, 2006). The alternate mode of rhizobial invasion is known as ‘crack-entry’  
73 where the rhizobia enter through natural cracks at the lateral root base in an intercellular manner.  
74 This is a characteristic feature of some subtropical legumes (e.g. *Arachis sp.*, *Aeschynomene sp.*,  
75 *Stylosanthes sp.*) belonging to dalbergoids/genistoids and accounts for approximately 25% of all  
76 legume genera (Gage, 2004; Giraud et al., 2007). In these legumes, rhizobia directly access the  
77 cortical cells for development of their nodule primordia and the infected cells repeatedly divide to  
78 develop the mature nodule (Boogerd and Rossum, 1997; Fabre et al., 2015).

79 Investigations on model legumes have unravelled the molecular basis of RNS. The host responses  
80 are initiated by Nod-factor (NF) receptors *LjNFR1/MtLYK3* and *LjNFR5/MtNFP* (Madsen et al.,  
81 2003; Radutoiu et al., 2003; Arrighi, 2006; Smit et al., 2007). Another NF induced  
82 receptor *LjEPR3* was shown to monitor rhizobial exopolysaccharide (EPS) in *L.japonicus*,  
83 indicating a two-stage mechanism involving sequential receptor-mediated recognition of NF and  
84 EPS signals to ensure host symbiont compatibility (Kawaharada et al., 2015). Downstream to  
85 NFRs is the ‘SYM pathway’ consisting of the receptor kinase *LjSYMRK/MtDMI2*(Endre et al.,  
86 2002; Stracke et al., 2002), the predicted ion-channel proteins *LjCASTOR* and  
87 *LjPOLLUX/MtDMI1*(Ané et al., 2004; Imaizumi-Anraku et al., 2005), the nucleoporins *LjNUP85*  
88 and *LjNUP133*(Kanamori et al., 2006; Saito et al., 2007), the Ca<sup>2+</sup>/calmodulin-dependent protein

89 kinase *LjCCaMK/MtDMI3* (Lévy et al., 2004; Tirichine et al., 2006), and the transcription factor  
90 *LjCYCLOPS/MtIPD3* (Messinese et al., 2007; Yano et al., 2008). Nodulation-specific  
91 transcription factors (TFs), such as *MtNSP1/LjNSP1*, *MtNSP2/LjNSP2*, *MtERF1* and  
92 *MtNIN/LjNIN* function downstream of the ‘SYM pathway’ and are involved in transcriptional  
93 reprogramming for initiation of RNS (Schauser et al., 1999a; Kaló et al., 2005; Smit et al., 2005;  
94 Middleton et al., 2007). Very limited information is available for crack-entry legumes from  
95 Dalbergioid/Genistoid clade which are basal in their divergence within the Papilionoideae even  
96 though they contain important crop legumes such as *Lupinus angustifolius* and *Arachis hypogaea*.  
97 Transcriptome analysis in legumes has been a valuable resource for understanding symbiosis-  
98 related genes in *M. truncatula*, *L. japonicus*, *Glycine max*, and *Cicer arietinum*. An earlier report  
99 have listed several differentially expressed genes (DEGs) at an early stage of symbiosis in *A.*  
100 *hypogaea* (Peng et al., 2017). The conservativeness among DEGs identified in such studies has  
101 implied common genetic mechanisms of RNS in legume species. Herein we report the  
102 transcriptome dynamics with the onset and advancement of symbiosis in *A. hypogaea* using  
103 uninfected roots (UI) as a reference. The transcription profile of the putative orthologues of  
104 symbiotic genes in crack-entry legume *A. hypogaea* is compared and contrasted with the  
105 corresponding expression profiles in *M. truncatula* and *L. japonicus* that undertake root hair  
106 mediated symbiosis.

107

## 108 **RESULTS**

### 109 **Progress of symbiosis in *Arachis hypogaea***

110 Within three weeks after infection with *Bradyrhizobium sp.* SEMIA 6144, *A. hypogaea* roots  
111 developed spherical functional nodules. We followed the progress of symbiosis in *A. hypogaea* for  
112 21 days to identify the distinct stages of development by ultrastructure analysis. There are rosettes  
113 of root hairs in the junction of taproot and lateral root that are reported to be important for  
114 bacterial invasion in *A. hypogaea* (Boogerd and Rossum, 1997). Within 1 day post infection (1dpi)  
115 rhizobia was found to be adhered to these root hairs (Fig. 1A-C). Within 4dpi, bump like  
116 primordial structures were noted at the lateral-root bases (Fig. 1D). The longitudinal sections of  
117 these primordia revealed one or more centrally-located defined pockets of rhizobia-infected cells  
118 that were surrounded by uninfected cells (Fig. 1E). These pockets of rhizobia infected cells were  
119 distinct by having reduced calcofluor-binding ability, indicating that they are thin-walled. The  
120 intracellularised rhizobia within the infection pocket was undifferentiated and rod-shaped (Fig.

121 1F). The infection pockets observed at 4dpi act as infection zone (IZ) founder cells and it is their  
122 uniform division and differentiation that give rise to the distinct aeschynomenoid type IZ in  
123 mature nodules. There has not been a single case where uninfected primordium was noted, which  
124 is in accordance with the proposition of infection preceding development of aeschynomenoid  
125 nodules (Fabre et al., 2015). By 8dpi there was visible nodule-like structure at the lateral-root base  
126 (Fig. 1G). Ultrastructure analysis revealed that by 8dpi, the compactness of the primordial  
127 structure with defined pockets of infected cells was lost and the IZ started growing by division of  
128 the infected cells (Fig. 1H-I). By 12dpi there were white spherical nodules (Fig. 1J). At this stage  
129 the tissue organization turned aeschynomenoid where there were no uninfected cells in the  
130 infection zone (IZ) and the endocytosed rhizobia remained undifferentiated and rod-shaped (Fig.  
131 1K-L). At 21dpi the nodules were mature and functional where the rhizobia differentiated within  
132 the plant derived peribacteroid membranes to develop spherical symbiosomes (Fig. 1M-O).

### 133 **Transcriptome analysis with the progress of symbiosis in *Arachis hypogaea***

134 Ultrastructural analysis revealed 5 distinct stages during the progress of symbiosis in *A. hypogaea*:  
135 1dpi: recognition and invasion; 4dpi: primordia formation; 8dpi: nodule-like structure; 12dpi:  
136 immature nodules with rod-shaped rhizobia; and 21dpi: mature nodules with spherical  
137 symbiosomes. To probe into the expression of genes associated with the progress of symbiosis,  
138 RNA was extracted from these stages along with UI roots. RNA-seq was done in triplicate for  
139 these six stages using Illumina single-end sequencing technology (IlluminaHiseq 2000 SR50).  
140 The genomic data from *Arachis duranensis* (AA) and *Arachis ipaensis* (BB) that are two wild  
141 diploid parents of *A. hypogaea* were used to assess the quality and coverage of the assembled  
142 transcriptomes. A total of 1,429,876,614 raw reads of 50bp (~71.5Gb) were generated with an  
143 average of 88,029,386 reads per library. This was 600 times the total size of transcript sequences  
144 (109.0 Mb) of *A. hypogaea* for both AA and BB genomes and gave an average coverage of 36  
145 times per library. The proportion of clean reads among the total acquired reads was more than  
146 91.34% (Table 1). The filtered reads were simultaneously mapped to the AA and BB genomes  
147 where the overall accepted mapping rate per library ranged from 80.15% to 89.98%, with an  
148 average mapping rate of 86.42% with *A. duranensis* (AA) and 86.65% with *A. ipaensis* (BB). For  
149 both AA and BB genome about 66% reads aligned to a gene exon in an unambiguous way,  
150 whereas the rest 33% reads aligned outside exon.

151 The expression level of each assembled transcript sequence was measured through FPKM  
152 (Fragments per kilo-base per million reads) values. The DEGs in the 5 different stages of  
153 symbiosis were evaluated by the significance of differences in their expression with respect to UI  
154 roots using false discovery rate (FDR) < 0.05, P-value <0.05 and fold change  $|\log_2 \text{ratio}| \geq 1$   
155 (Supplementary Table 1). Comparison between upregulated and downregulated DEGs at different  
156 stages is shown in a Venn-Diagram in (Fig.2A). A total of 2745 genes were up-regulated  
157 ( 1296:AA, ; 1449:BB) and a total of 20415 genes are down-regulated ( 9709:AA; 10706:BB)  
158 during symbiosis of which 59 genes (33:AA;26:BB) were upregulated and 2095 genes  
159 (1056:AA;1039:BB) were downregulated in all the 5 stages of symbiosis. From the Venn-diagram  
160 we identified those genes that were first upregulated or downregulated at a particular stage  
161 though their subsequent regulations could be different. The number of such genes upregulated or  
162 downregulated at each stage from AA or BB genome is shown in Supplementary Table 2.  
163 Differentially expressed genes show clear transcriptional shifts at these stages and the diverse  
164 expression patterns of these genes are indicated in a heatmap (Fig.2B). The major expression  
165 profiles are shown in expanded heatmaps and line graphs in (Supplementary fig.1). Hierarchical  
166 clustering as well as PCA analysis (Supplementary fig.1C) of the transcriptome indicated 3  
167 distinct expression waves. Cluster 1 consists of 1dpi-4dpi transcripts where rhizobial invasion and  
168 primordia formation occurs. Cluster 2 consists of 8dpi-12dpi transcripts where the primordia  
169 structurally develop into a nodule and cluster 3 consists of the 21dpi transcripts where nodule  
170 matures to its functional form (Fig.2B; Supplementary fig.1).

### 171 **Functional analysis of DEGs**

172 GO and KEGG terms that are significantly enriched in our DEGs are indicated in Supplementary  
173 fig. 2. Among the 1248 enriched GO terms there was a major representation of defense response  
174 genes. 470 and 31 such defense related GO terms were enriched in downregulated and  
175 upregulated DEGs respectively (Supplementary Table 1). Accordingly, KEGG analysis of plant-  
176 pathogen interaction pathways show that most genes involved in pattern-triggered immunity (PTI)  
177 was notably down-regulated (Fig. 3A-B; Supplementary Table 3). The FLS2 mediated MAPK  
178 pathway however remained active along with a subset of *CNGCs* and genes encoding Rboh  
179 proteins. A subset of genes involved in the effector triggered immunity (ETI) also remained active  
180 during symbiosis, for example the genes encoding R proteins like RPM1, RPS2, RPS5, Pti1  
181 kinase, and the pathway regulators like SGT1, HSP90 and EDS1. Intriguingly there was a  
182 significant upregulation of gene encoding PR-1 proteins which are members of Cysteine-rich



183 secretory proteins, Antigen 5, and Pathogenesis-related 1 proteins (CAP) superfamily (Breen et  
184 al., 2017). The PR-1 proteins upregulated during symbiosis clustered away from the PR-1 proteins  
185 that were reported to be upregulated in defense responses indicating the symbiosis associated PR-  
186 1 proteins to be divergent in nature (Fig. 3C). There are two PR-1 proteins that clustered with  
187 defense responsive PRs and these *PR-1* genes were not upregulated during symbiosis further  
188 confirming the symbiotic PR-1s to be distinct. PR-1 proteins harbour an embedded defence  
189 signalling peptide (CAP-derived peptides or CAPE) where CNYxPxGNxxxxxPY is considered as  
190 a functional motif that mark cleavage of these bioactive peptides (Breen et al., 2017). The  
191 cleavage site is conserved in both classes of PR-1 proteins suggesting the CAPE peptides could  
192 also be generated from the divergent PR-1 proteins synthesized during symbiosis (Fig. 3C-D,  
193 Supplementary Table 7). Since genes encoding CAP proteins are marker genes for the salicylic  
194 acid signaling pathway and systemic acquired resistance we also checked the SA/JA pathways to  
195 further understand the symbiont responsive signaling in *A. hypogaea*. As shown in Fig. 3A the JA  
196 pathway was completely downregulated but the SA responsive genes like *TGAI* and *NPRI* were  
197 up-regulated. Thus symbiotic *PR-1* gene expression could be justified by the activation of the SA  
198 mediated signaling. It needs to be mentioned that our analysis could not locate genes encoding  
199 NODULE SPECIFIC CYSTEINE-RICH (NCR) peptides in the DEGs that occurs in legumes  
200 belonging to the inverted repeat-lacking clade (IRLC) (e.g. *M. truncatula*, *Pisum sp.*, and  
201 *Trifolium sp.*) and recently demonstrated in *Aeschynomene sp.* as well (Van de Velde et al., 2010;  
202 Czernic et al., 2015).

203 Several genes are reported to be expressed in nodulating roots by comparing the transcriptome  
204 profiles of nonnodulating and nodulating lines of *A. hypogaea* (Peng et al., 2017). The list  
205 includes known symbiotic genes like *NIN*, *NF-YA*, *Myb* and *CLE13* and other genes encoding a  
206 receptor kinase, a soluble kinase, a F-BOX protein, transcription factors of SHI-family and a  
207 lectin (Supplementary fig. 3; Supplementary Table 4). All these genes were represented in our  
208 upregulated transcriptome which thereby revalidates the importance of expression of these genes  
209 during the onset of symbiosis in *A. hypogaea*.

### 210 **Expression profiles of putative orthologues of symbiotic genes**

211 Our final objective was to understand the expression of the putative orthologues of symbiotic  
212 genes in *A. hypogaea* that are characterized in the model legumes *M. truncatula* and *L.*  
213 *japonicus*. A total of 71 genes were chosen and classified on the basis of their primary

214 association (Fig. 4; Supplementary Table 5). BLAST search on *A. ipanensis* and *A. duranensis*  
215 genome identified 68 (63 annotated) out of 71 genes for which the putative orthology was  
216 checked by reciprocal BLAST and sequence alignment. No orthologous gene for *MtRPG*,  
217 *MtSymCRK* and *MtDNF2* could be detected in either of these two parental genomes or in our  
218 transcriptome. For 63 out of 68 genes the symbiotic orthologue could be identified where the *A.*  
219 *hypogaea* sequences clustered with other legumes in the corresponding gene trees  
220 (Supplementary fig. 4). But in most cases the *A. hypogaea* genes were placed at the point of  
221 divergence of legumes from nonlegumes which is similar to what has been reported for  
222 *AhSYMRK*, *AhCCaMK* and *AhHK1* in respective distance trees (Sinharoy and DasGupta, 2009;  
223 Saha et al., 2014; Kundu and DasGupta, 2017b). Separation between the *A. hypogaea* genes and  
224 the other legume genes correlates with the rhizobial colonization by crack-entry and ITs.  
225 Exceptions were genes like *MtFLOT4*, *LjROP6*, *MtRR9*, *MtNOOT* and *LjSEN1* where the protein  
226 sequences from *A. hypogaea* were divergent and clustered with nonlegumes. However the  
227 expression of all these divergent genes was found to be significantly high during symbiosis  
228 indicating that they might have a role in *A. hypogaea* nodulation. In several cases we noted  
229 genomic bias in expression; for example genes like *LjNF-YC*, *MtFLOT2*, *MtFLOT4*, *LjROP6*,  
230 *MtbHLH476* and *MtRR4* had AA biased expression whereas expression of *MtDELLA*, *MtERF1*,  
231 *LjCHC1* and *LjASTRAY* was BB biased (Fig. 4). For comparison of expression of different  
232 symbiotic genes we used the microarray data derived from the *M. truncatula* gene expression atlas  
233 (MtGEA) (<http://mtgea.noble.org/v2/>) (Benedito et al., 2008) & *L. japonicus* gene expression atlas  
234 (LjGEA) (<https://ljgea.noble.org/v2/>) (Verdier et al., 2013). If a symbiotic gene is characterised  
235 from one of these model legumes reciprocal BLAST was done to identify the orthologue in the  
236 other (Supplementary Table 5). Both absolute and the relative expression values ( $\log_2$  fold) were  
237 analysed so that high and constitutively expressed genes are not ignored (Fig. 4; Supplementary  
238 fig. 5).

239 In the recognition module, expression of genes encoding LCO-binding *LYR3* (Fliegmann et al.,  
240 2013) and EPS binding *EPR3* (Kawaharada et al., 2015) was significantly higher in *A. hypogaea*  
241 than the classical NF receptors (Fig. 4A). Whereas, in the model legumes the classical NF  
242 receptors like *LjNFR1/MtLYK3* and *LjNFR5/MtNFP* have a higher expression than these  
243 receptors. In the SYM pathway and early signaling most members had constitutive expression in  
244 all the 3 legumes irrespective of their mode of bacterial colonisation (Fig. 4B). Exception was  
245 gene encoding orthologue of cyclic nucleotide-gated channel *MtCNGC* (Charpentier et al., 2016)



246 which was significantly upregulated in *A. hypogaea*. Most of the interactors of *NFRs* and *SYMRK*  
247 were also constitutively expressed (Fig. 4C). Expression of genes encoding ubiquitin ligase *SIE3*  
248 (Yuan et al., 2012) (*SYMRK* interactor) and a *UBQ* superfamily protein *CIP73* (Kang et al.,  
249 2011) (*CCaMK* interactor) was constitutively expressed in *A.hypogaea*. Genes encoding *E3*  
250 ubiquitin ligase *MtPUB1*(Mbengue et al., 2010) (*NFR1* interactor) and a symbiotic remorin  
251 *MtSYMREM* (Lefebvre et al., 2010) (*SYMRK* and *NFR1* interactor) that were upregulated in all  
252 3 legumes highlighting their importance in nodulation. Among the TFs, upregulation of *NIN*  
253 (Singh et al., 2014) (target of *CYCLOPS*) expression was noted in the second transcriptional wave  
254 at 8dpi and expression of *NSP2* was only detectable in mature nodules of *A. hypogaea* (Fig. 4D).  
255 In model legumes expression of *NIN* and *NSP2* were upregulated on bacterial invasion(Schauser  
256 et al., 1999b; Kaló et al., 2005). Unlike model legumes, expression of *MtERF1* as compare to  
257 other TFs was very high in *A. hypogaea*. The Expression pattern of *MtNSP1*, *LjNFYA/ LjNFYC*  
258 (McDowell et al., 2013) (target of *NIN*), *LjERN1*(Cerri et al., 2017) (target of *CYCLOPS*),  
259 *MtDELLA* (Jin et al., 2016) (bridge between *IPD3/CYCLOPS* and *NSP2*), *LjIPN2* (Kang et al.,  
260 2014) (*NSP2* interactor) and *LjSIN1*(Battaglia et al., 2014) (*NF-YC* interactor) was similar in *A.*  
261 *hypogaea* and in model legumes, suggesting that the basic transcriptional network could be  
262 conserved between these legumes. In the infection module *MtRPG* is responsible for rhizobium-  
263 directed polar growth of ITs and gene encoding it's orthologue was not detected in *A. hypogaea*  
264 (Arrighi et al., 2008). *MtVPY* (ankyrin repeat) is important for infection progression in model  
265 legumes (Murray et al., 2011a) and it had significantly low expression in *A. hypogaea*. On the  
266 other hand expression of factors like *LjARPC1*(Hossain et al., 2012) and *LjCEREBERUS* (Yano et  
267 al., 2009) that are important for the progress of infection was significantly higher in *A. hypogaea*  
268 (Fig. 4E).Other indicated factors that are required for bacterial invasion like *LjNAPI*(Yokota et  
269 al., 2009), *LjPIRI*(Yokota et al., 2009), *LjnsRING* (Shimomura et al., 2006), *MtFLOT4* (Haney  
270 and Long, 2010) and *MtFLOT2* (Haney and Long, 2010) were induced in all 3 legumes suggesting  
271 their analogous purposes. In the nodule organogenesis module, expression of cytokinin receptor  
272 *MtCRE1/LjHK1/AhHK1*(Gonzalez-Rizzo et al., 2006b; Murray et al., 2007; Kundu and DasGupta,  
273 2017a) and the cytokinin inducible Type-A RRs like *MtRR1*(Ariel et al., 2012), *MtRR4*(Gonzalez-  
274 Rizzo et al., 2006b; Op den Camp et al., 2011), *LjRR5*(Murray et al., 2007) and *MtRR9* (Op den  
275 Camp et al., 2011)was high in all 3 legumes (Fig. 4F). The expression of cytokinin inducible TF  
276 *MtbHLH476* (Ariel et al., 2012) was however significantly high in *A. hypogaea* (Fig. 4F). All  
277 other factors that are required for the establishment and maintenance of nodule meristems like  
278 *MtNIP/LATD* (Yendrek et al., 2010), *MtWOX5* (Osipova et al., 2012), *MtNOOT* (Couzigou et al.,

279 2012) and *MtENOD40* (Crespi et al., 1994) have comparable expression pattern between *A.*  
280 *hypogaea* and model legumes (Fig. 4F). In the differentiation module, both *MtDNF2* and  
281 *MtSymCRK* are reported for suppressing defense responses during nodulation were not detected in  
282 *A. hypogaea* genome (Bourcy et al., 2013; Berrabah et al., 2014). All other factors that are  
283 required for bacteroid differentiation like *LjSUNERGOS1* (Yoon et al., 2014), *LjVAG1* (Suzaki et  
284 al., 2014), *MtDNF1* (Wang et al., 2010), *MtRSD* (Sinharoy et al., 2013), *LjSEN1* (Hakoyama et al.,  
285 2012), *LjSST1* (Krusell, 2005) and *LjFEN1* (Hakoyama et al., 2009) have similar expression in all 3  
286 legumes and may have conserved function (Fig. 4G). Among the nodule number regulators,  
287 expression of *MtEIN2* (Varma Penmetsa et al., 2008) (*sickle*) was distinct in *A. hypogaea* (Fig. 4H).  
288 It plays a key role in a range of plant–microbe interactions and had a significantly high expression  
289 in *A. hypogaea*. All other regulators like *MtSUNN* (Elise et al., 2005), *LjKLAVIER* (Miyazawa et  
290 al., 2010), *MtEFD* (Vernie et al., 2008a), *LjASTRAY* (Nishimura et al., 2002) and *MtRDN*  
291 (Kassaw et al., 2017) has comparable expression pattern in all 3 legumes (Fig. 4H). Quantitative  
292 reverse transcription-polymerase chain reaction (qRT-PCR) was done for 11 symbiotic genes to  
293 prove the reliability of the RNAseq data (Supplementary Fig. 6). For few time-points the fold  
294 change of qRT-PCR and DEG analysis did not exactly match but mostly the results highlighted  
295 their consistency.

## 296 **PCA of symbiotic gene expression in *Arachis hypogaea* and model legumes**

297 PCA analysis was done to check if there was a signature in the pattern of expression of symbiotic  
298 genes in crack-entry legume *A. hypogaea* that contrasts with the model legumes where rhizobial  
299 entry is IT mediated. Fig. 5 is a projection of differential expression of symbiotic genes from *A.*  
300 *hypogaea*, *M.truncatula* and *L.japonicus* into first two principal components. Altogether,  
301 expression of around 87% genes were found to be aligned along dimension1 (dim1) and  
302 dimension 2 (dim2) in the analysis. Expressions of symbiotic genes that show minimal change in  
303 expression and are likely to be regulated at post transcriptional level are clustered near the origin.  
304 Only for select genes, there were contrasting trends in differential expression  
305 between *A.hypogaea* and both the model legumes together placing them in opposing or adjacent  
306 quadrants. These contrasts were interpreted as significant for *A.hypogaea* symbiosis  
307 (Supplementary fig. 7). For example, among the early signaling and SYM pathway genes  
308 *AhCNGC* was distinctly placed away from their counterparts in model legumes. Among early TFs,  
309 *NIN*, *NSP2*, and *SINI* were distinct. In the infection module, *AhVPY* and *AhCERBERUS* were  
310 distinct and placed in opposing quadrants with respect to model legumes. Among the interacting

311 proteins, *PUBI* scores in both dimensions in model legumes whereas in *A.hypogaea* it clusters  
312 near the origin. In the organogenesis module cytokinin inducible *RRI* and *ENOD40* and in the  
313 nodule differentiation module *SSTI* have a contrasting trend in expression. Among the nodule  
314 number regulators expression of *EFD* was distinct. These factors highlighted by PCA analysis  
315 appear to be differentially adapted in *A. hypogaea* symbiosis.

316

## 317 **DISCUSSION**

318 This is the first systematic effort towards transcriptome profiling with the progress of symbiosis in  
319 a crack-entry legume *A. hypogaea*. 3 major transcriptional programs appear to govern the process.  
320 The first program is for rhizobial recognition and generation of nodule primordia by 1-4 dpi, the  
321 2<sup>nd</sup> program is for structural development of nodules by 8-12dpi and the 3<sup>rd</sup> program is for  
322 functional maturation of nodules at 21dpi (Fig. 1-2). The comparison of expression of putative  
323 orthologues of symbiotically important genes in *A. hypogaea* with model legumes highlighted the  
324 genes that are important or disposable for its crack-entry mediated root nodule symbiosis (Fig. 4-  
325 6).

326 The most significant observation in *A. hypogaea* symbiotic transcriptome was the over expression  
327 of a group of genes encoding a divergent form of cysteine rich PR-1 proteins during the structural  
328 and functional development of nodules 8dpi onwards (Fig. 3). PR-1 proteins are ubiquitous  
329 across plant species and are among the most abundantly produced proteins in plants in response to  
330 pathogen attack. It is used as a marker for salicylic acid-mediated disease resistance in  
331 plants (Breen et al., 2017). Although differential expression of defense response genes belonging  
332 to GO:0006952 (defense related) and *PR-1/PR-10* protein families has previously been reported  
333 for *M.truncatula* RNS (Jardinaud et al., 2016), this is the first report where a divergent group of  
334 PR-1 proteins is shown to be associated with nodule development (Fig. 3). PR-1 proteins harbor a  
335 caveolin binding motif (CBM) that binds sterol and an embedded Pro-rich C-terminal peptide  
336 (CAPE) that is involved in plant immune signaling (Breen et al., 2017). All the symbiotic PR-1s in  
337 *A. hypogaea* has both these conserved features but whether these CAPE peptides are actually  
338 derived from PR-1 proteins during symbiosis remains to be understood. It is relevant to mention  
339 here that NCR family of peptides are very highly expressed during nodulation in *M. truncatula*  
340 (Van de Velde et al., 2010). These peptides evolved from defensin ancestors and until recently  
341 was assumed to be specific to legume species belonging to the IRLC clade where they are

342 responsible for bacterial endoreduplication (Mergaert et al., 2006). Recently, divergent form of  
343 NCR peptides were reported to be essential for bacterial endoreduplication associated shape  
344 change in Nod-factor independent crack-entry legume *A. evenia* (Czernic et al., 2015). Intriguingly  
345 NCRs were absent in crack-entry legume *A. hypogaea* where similar to *A. evenia*, rhizobia  
346 change from a rod to spherical shape but unlike *Aeschynomene sp.* the symbiosis in *A. hypogaea*  
347 is NF-dependent (CHANDLER et al., 1982; Ibáñez and Fabra, 2011). Thus, it is imperative to  
348 investigate whether the antimicrobial CAPE peptides were enrolled as symbiosis effectors in *A.*  
349 *hypogaea* in place of NCRs.

350 Based on the comparative expression analysis of symbiotic genes, we propose a simple molecular  
351 framework where we highlighted those genes in *A. hypogaea* that are either conserved or  
352 divergent from the model legumes be it in sequence or in expression pattern (Fig. 6). The high  
353 expression of LCO binding receptor *LYR3* as compared to the classical NF receptors indicated NF  
354 signalling could be mediated through this receptor in *A. hypogaea* (Fig. 4). Intriguingly *NFRI*  
355 and *LYR3* were not reported in *A. evenia*, which is a NF-independent crack-entry legume as  
356 opposed to *A. hypogaea* which is NF-dependent (Ibáñez and Fabra, 2011; Fabre et al., 2015;  
357 Chaintreuil et al., 2016). Expression pattern of genes belonging to SYM pathway and early  
358 signalling in *A. hypogaea* were found to be similar to model legumes with only exception being  
359 *AhCNGC*. Significant upregulation of *AhCNGC* suggests its possible importance in mediating  
360 symbiotic calcium oscillations in the SYM pathway of crack-entry legumes.

361 Several observations indicated change in expression pattern of symbiotic genes in *A. hypogaea* in  
362 the absence of epidermal IT formation. For example TFs like *AhNIN* and *AhNSP2* are only  
363 expressed at the later stages of symbiosis in *A. hypogaea* indicating that unlike in model legumes  
364 these TFs may not have an early role in bacterial entry (Fig. 4). However, the cortical roles for  
365 these TFs could be conserved between IT and crack-entry legumes. Factors like *MtVPY* and  
366 *MtRPG* have a role in polar growth process of IT in model legumes (Arrighi et al., 2008; Murray  
367 et al., 2011b). That explains the absence of *RPG* and insignificant expression of *VPY* in *A.*  
368 *hypogaea* transcriptome (Fig. 4). The contrasting expression pattern of *LjCERBERUS* in *A.*  
369 *hypogaea* indicated its divergent function during rhizobial invasion through epidermal cracks. In  
370 NF-dependent symbiosis, membrane raft proteins like *MtFLOT2* and *MtFLOT4* are important for  
371 IT initiation and elongation (Haney and Long, 2009). While orthologues of both these *FLOTs* are  
372 absent in NF-independent crack-entry legume *A. evenia* (Chaintreuil et al., 2016), substantial  
373 expression was detected in *A. hypogaea* transcriptome suggesting them to be recruited for other

374 purposes (Fig. 3). The orthologue of EPS binding receptor *MtEPR3* is absent in *A. evenia* but  
375 upregulated during symbiosis in *A. hypogaea* suggesting it to have functions other than regulating  
376 IT progression.

377 Apart from NCRs, there are other features that contrast the process of differentiation in *A.*  
378 *hypogaea* and *A. evenia*. For example, neither of the topoisomerases *LjSUNERGOS* and *LjVAGI*  
379 and the homocitrate synthase *LjFENI* is detectable in *A. evenia* (Chaintreuil et al., 2016). On the  
380 other hand *MtDNF2*, a phospholipaseC and *MtSymCRK* a non-RD receptor kinase that are  
381 required for suppressing defense response during bacteroid differentiation are absent in both the  
382 legumes belonging to the dalbergoid clade (Fig.6), thus indicating these genes to be disposable for  
383 crack entry mediated root nodule symbiosis.

384 Comparative analysis of DEGs between *A. hypogaea* and model legume highlighted the  
385 predominance of cytokinin and ethylene signaling during *A. hypogaea* nodulation. Two  
386 component cytokinin receptor HK1 has a central role in nodule organogenesis of both *A.*  
387 *hypogaea* and model legumes (Gonzalez-Rizzo et al., 2006a; Murray et al., 2007; Kundu and  
388 DasGupta, 2017b). Although PCA analysis indicated *AhHK1*, *LjHK1* (*LHK1*) and *MtCRE1* to  
389 have similar expression pattern, its downstream effectors showed altered pattern of expression  
390 during *A. hypogaea* symbiosis (Fig. 5). Expressions of type-B RR like *MtRR1*, which is cytokinin  
391 responsive transcription factor and responsible for modulating downstream factors like  
392 *MtNSP1* and *MtHHLH476* was found to have a distinct expression pattern in *A. hypogaea* in  
393 comparison to its model legume counterparts (Fig. 5). In accordance, *AhHHLH476* was found to  
394 be very highly expressed during *A. hypogaea* nodulation (Fig. 4). Another cytokinin responsive  
395 factor *AhENOD40* was also found to be distinctly placed in a different quadrant in PCA analysis  
396 (Fig. 5). The distinct role of cytokinin signaling during *A. hypogaea* nodulation is in accordance to  
397 the previous report where silencing of *AhHK1* resulted in delayed nodulation associated with  
398 problem in nodule differentiation (Kundu and DasGupta, 2017b).

399 During nodulation ethylene responsive transcription factors play a decisive role by controlling cell  
400 division and differentiation (Asamizu et al., 2008; Vernie et al., 2008b). Previous report on *A.*  
401 *hypogaea* transcriptomics highlighted the upregulation of several AP2-domain containing  
402 ethylene responsive TFs during nodulation (Peng et al., 2017). Similarly, our transcriptomic  
403 analysis also indicated significantly high expression of the symbiotic orthologue of *ERF1* (Fig.4).  
404 In *L. japonicus* *LjERF1* is a positive regulator of nodulation and downregulates the expression of



405 defense gene *LjPR-10* during symbiosis(Asamizu et al., 2008). Intriguingly in *A.hypogaea* high  
406 expression of *ERF1* is associated with high expression of *PR-1s* indicating that the ethylene  
407 signalling network is differently recruited during *A.hypogaea* symbiosis (Fig. 5).In consistence  
408 with such proposition the expression of *EIN2*, the master regulator of ethylene signalling was  
409 significantly high in *A.hypogaea*, and the pattern of expression of *EFD*, a negative regulator of  
410 nodulation was distinctly different from model legumes (Fig. 4-5). The differential role of  
411 ethylene signalling during crack entry nodulation strongly supports the fact that ethylene  
412 signalling inhibits intracellular infection via infection threads while promoting intercellular  
413 infection via crack-entry (Vernie et al., 2008b).

414 In summary, the transcriptional dynamics with the progress of symbiosis in *A.*  
415 *hypogaea* highlighted the factors that are disposable or essential for the inception and progress of  
416 symbiosis in a crack entry legume.

417

## 418 **MATERIALS AND METHODS:**

### 419 **Plant Materials and Sample Preparation:**

420 Five different developmental stages of *A. hypogaea* total infected roots, nodules and uninfected  
421 roots were used in this study (UI, 1DPI, 4DPI, 8DPI, 12DPI and 21DPI). *A. hypogaea* JL24 strain  
422 seeds (from ICRISAT, INDIA) were surface sterilized and soaked into sterile water for  
423 germination. Germinated seeds were then transferred in pots containing sterile vermiculite and  
424 soilrite at 25°C growth room for 7 days before inoculation with *Bradyrhizobium sp.* SEMIA 6144  
425 (from Adriana Fabra, Universidad Nacional de Rio cuarto, Cordoba, Argentina) grown in liquid  
426 Yeast-Mannitol broth supplemented with 100mM CaCl<sub>2</sub> at 28°C(A<sub>600</sub>= 0.5–0.7). Samples are  
427 harvested, cleaned and freezed in liquid nitrogen. Frozen samples are stored at -80°C for RNA  
428 isolation.

### 429 **Phenotypic analysis and microscopy:**

430 Images of whole-mount nodulated roots were captured using a Leica stereo fluorescence  
431 microscope M205FA equipped with a Leica DFC310FX digital camera (Leica Microsystems).  
432 Detached nodules were embedded in Shandon cryomatrix (Thermo scientific) and sliced into 30-  
433 µm thick sections with a rotary cryomicrotome CM1850 (Leica Microsystems). For confocal  
434 microscopy, sample preparation was done according to Haynes and associates(Haynes et al.,  
435 2004). Sections were stained with Calcofluor (Life Technologies), Propidium Iodide (Life



436 Technologies) and Syto9 (Life Technologies). Images were acquired with a Leica TCS SP5 II  
437 AOBS confocal laser scanning microscope (Leica Microsystems). For confocal and scanning  
438 electron microscopy, sample preparation was done according to Kundu et al. (Kundu and  
439 DasGupta, 2017b). All digital micrographs were processed using Adobe Photoshop CS5.

#### 440 **Isolation of total RNA:**

441 A total 100mg of frozen plant root was ground in liquid nitrogen, and total RNA was isolated  
442 using Trizol reagent (Invitrogen, USA). RNA degradation and contamination was detected on 1%  
443 agarose gels. RNA concentration was then measured using NanoDrop spectrophotometer (Thermo  
444 Scientific). Additionally, RNA integrity was assessed using the Bioanalyzer 2100 system (Agilent  
445 Technologies, Santa Clara, CA, USA). Finally, the samples with RNA integrity number (RIN)  
446 values above 8 were used for library construction.

#### 447 **Library construction and Sequencing:**

448 18 RNA library was prepared using an IlluminaTruSeq stranded mRNA sample preparation kit by  
449 MGX-Montpellier GenomiX core facility (MGX) France (<https://www.mgx.cnrs.fr/>). The  
450 protocol first requires the selection of polyadenylated RNAs on oligodT magnetic beads. Selected  
451 RNAs are chemically fragmented and the first strand cDNA is synthesized in the presence of  
452 actinomycin D. The second strand cDNA synthesis is incorporating with dUTP in place of dTTP  
453 which quenches it to the second strand during amplification. A 3' ends adenylation is used to  
454 prevent fragments from ligating to one another during the adapter ligation process. The  
455 quantitative and qualitative validation of the library is performed by qPCR, ROCHE Light Cycler  
456 480 and cluster generation and primary hybridization are performed in the cBot with an Illumina  
457 cluster generation kit. The sample libraries were sequenced on an IlluminaHiSeq 2000,  
458 sequencing by synthesis (SBS) technique performed by MGX, France and 50bp single-end reads  
459 for each library were generated (Fuller, 1995).

#### 460 **Illumina Reads Mapping and Assembly:**

461 Quality control and assesment of raw Illumina reads in FASTQformat were done by FastQC  
462 software (Version 0.11.5) to obtain per base quality, GC content and sequence length distribution.  
463 Clean reads were obtained by removing the low quality reads, adapters, poly-N containing reads  
464 by using Trimmomatic v0.36 software(Bolger et al., 2014). Clean Reads are simultaneously  
465 aligned to the two wild peanut diploid ancestors *A. duranensis*(AA) and *A. ipaensis*(BB) reference  
466 genome by using TopHat2 version 2.0.13 which is a fast splice junction mapper for RNA-Seq

467 reads (Trapnell et al., 2010; Bertoli et al., 2015). It aligns RNA-Seq reads using the ultra high-  
468 throughput short read aligner Bowtie2 version 2.2.3, and then analyzes the mapping results to  
469 identify splice junctions between exons(Langmead et al., 2009). The alignment files were  
470 combined and analyzed into Trinity for genome-guided assembly (Grabherr et al., 2011). The  
471 reference based assembly was compared to its respective transcript files from annotated reference  
472 genomes by using BLAT(Kent, 2002). An e-value cutoff of '1e<sup>-05</sup>' was used to determine a hit.  
473 The annotated hits were furthermore analysed in this study. Genome annotation files in generic  
474 feature format (GFF) are downloaded from peanut database  
475 (<https://peanutbase.org/download>)(Dash et al., 2016). Estimation of gene expression level of each  
476 annotated transcript was performed by StringTie v1.3.3 which takes sorted sequence alignment  
477 map (SAM) or binary (BAM) file for each sample along with genome annotation files (Pertea et  
478 al., 2015). Resulted gene transfer format (GTF), normalized gene locus expression level as  
479 fragments per kilobase million (FPKM), transcripts per million (TPM), and count files for each  
480 sample were further analyzed for fold change analysis in gene expression levels.

#### 481 **Identification of DEGs and functional Gene Ontology and KEGG pathway analyses of the** 482 **DEGs:**

483 Before statistical analysis, genes with less than 2 values lower than one count per million (cpm)  
484 were filtered out. EdgeR 3.6.7 package was used to identify the differentially expressed  
485 genes(Robinson et al., 2010). Data were normalized using "Trimmed mean of M-values (TMM)"  
486 method. Genes with adjusted p-value less than 5% (according to the FDR method using  
487 Benjamini-Hochberg correction) and $|\log_2(\text{fold change})| > 1$  was called differentially expressed.  
488 Venn-diagram are generated using (<http://www.interactivenn.net/>)(Heberle et al., 2015) and  
489 hierarchical heatmap is generated usingTM4MeV (<http://mev.tm4.org> and  
490 <http://www.tigr.org/software/tm4/mev.html>)(Howe et al., 2011) the values from the venn diagram  
491 (Supplementary Table 2).Detailed functional annotation and explanations of DEGs were extracted  
492 from gene ontology database (<http://www.geneontology.org/>)(Ashburner et al., 2000) and GO  
493 functional classification analysis was done using software WEGO  
494 (<http://wego.genomics.org.cn/cgi-bin/wego/index.pl>)(Ye et al., 2006). The GO terms for DEGs in  
495 genome annotation were also retrieved from the 'GFF' file downloaded at PeanutBase website  
496 (<http://peanutbase.org>). To identify important and enriched pathways involved by the DEGs, the  
497 DEGs were assigned to the Kyoto Encyclopedia of Genes and Genomes (KEGG) pathways using  
498 the web server ([http://www.genome.jp/kaas-bin/kaas\\_main](http://www.genome.jp/kaas-bin/kaas_main))(Kanehisa and Goto, 2000) against A.

499 *duranensis* and *A. ipaensis* gene datasets. Enriched KO and GO terms are obtained by a developed  
500 Python script which uses hypergeometric test and Bonferroni corrected P-Value < 0.05.

#### 501 **Identification of Symbiotic orthologous gene in *A. hypogaea*:**

502 Candidate symbiotic genes were identified in *A. hypogaea*, *L. japonicus* and *M. truncatula* using  
503 BLASTN searches with reported nucleotide sequence of genes from *L. japonicus* and *M.*  
504 *truncatula*. The homologous genes of were searched in *A. duranensis* and *A. ipaensis* in  
505 *PeanutBase* (<http://peanutbase.org>), *M. truncatula Mt4.0v1* genome was searched in *M.truncatula*  
506 gene expression atlas(MtGEA) (<http://mtgea.noble.org/v2/>) and the *L. japonicus v3.0* genome was  
507 searched in *L. japonicus* gene expression atlas (LjGEA) (<https://ljgea.noble.org/v2/>). Initial  
508 searches were conducted with E-value =  $e^{-5}$ . The results were manually validated for the presence  
509 of an orthologous gene in an open reading frame and searched for orthologues using BLASTP.  
510 Orthology of the genes were validated by generating neighbor joining phylogenetic tree using  
511 amino acid sequences in MEGA 6.0 obtained from BLASTP (Tamura et al., 2013).

#### 512 **qRT PCR validation:**

513 Total RNA (500 ng) was reverse-transcribed by using Super-ScriptIII RT (Life Technologies) and  
514 oligo (dT). RNA quantity from each sample in each biological replicate was standardized prior to  
515 first-strand cDNA synthesis. qRT-PCR was performed by using Power SYBR Green PCR Master  
516 Mix (Applied Biosystems) using primers as designed using software Oligoanalyser (Integrated  
517 DNA Technology) (Supplementary Table S6). Calculations were done using the cycle  
518 threshold method using *AhActin* as the endogenous control. The reaction were run in Applied  
519 biosystems 7500 Fast HT platform using protocol: 1 cycle at 50°C for 2 mins, 1 cycle at 95°C for  
520 5 min, 40 cycles at 95°C for 30 sec, 54°C for 30 sec, 72°C for 30 sec followed by melt curve  
521 analysis at 1 cycle at 95°C for 1 min, 55°C for 30 sec, and 95°C for 30 sec. A negative control  
522 without cDNA template was checked for each primer combination which was designed using  
523 OligoAnalyzer 3.1 (<https://www.idtdna.com/calc/analyzer>). Results were expressed as means  
524 standard error (SE) of the number of experiments.

#### 525 **Data Availability:**

526 The raw FASTQ files for the 18 libraries were deposited in the Gene expression omnibus (GEO)  
527 of NCBI under accession number GSE98997.

528

529



530 **Figures:**

531 **Figure1:**

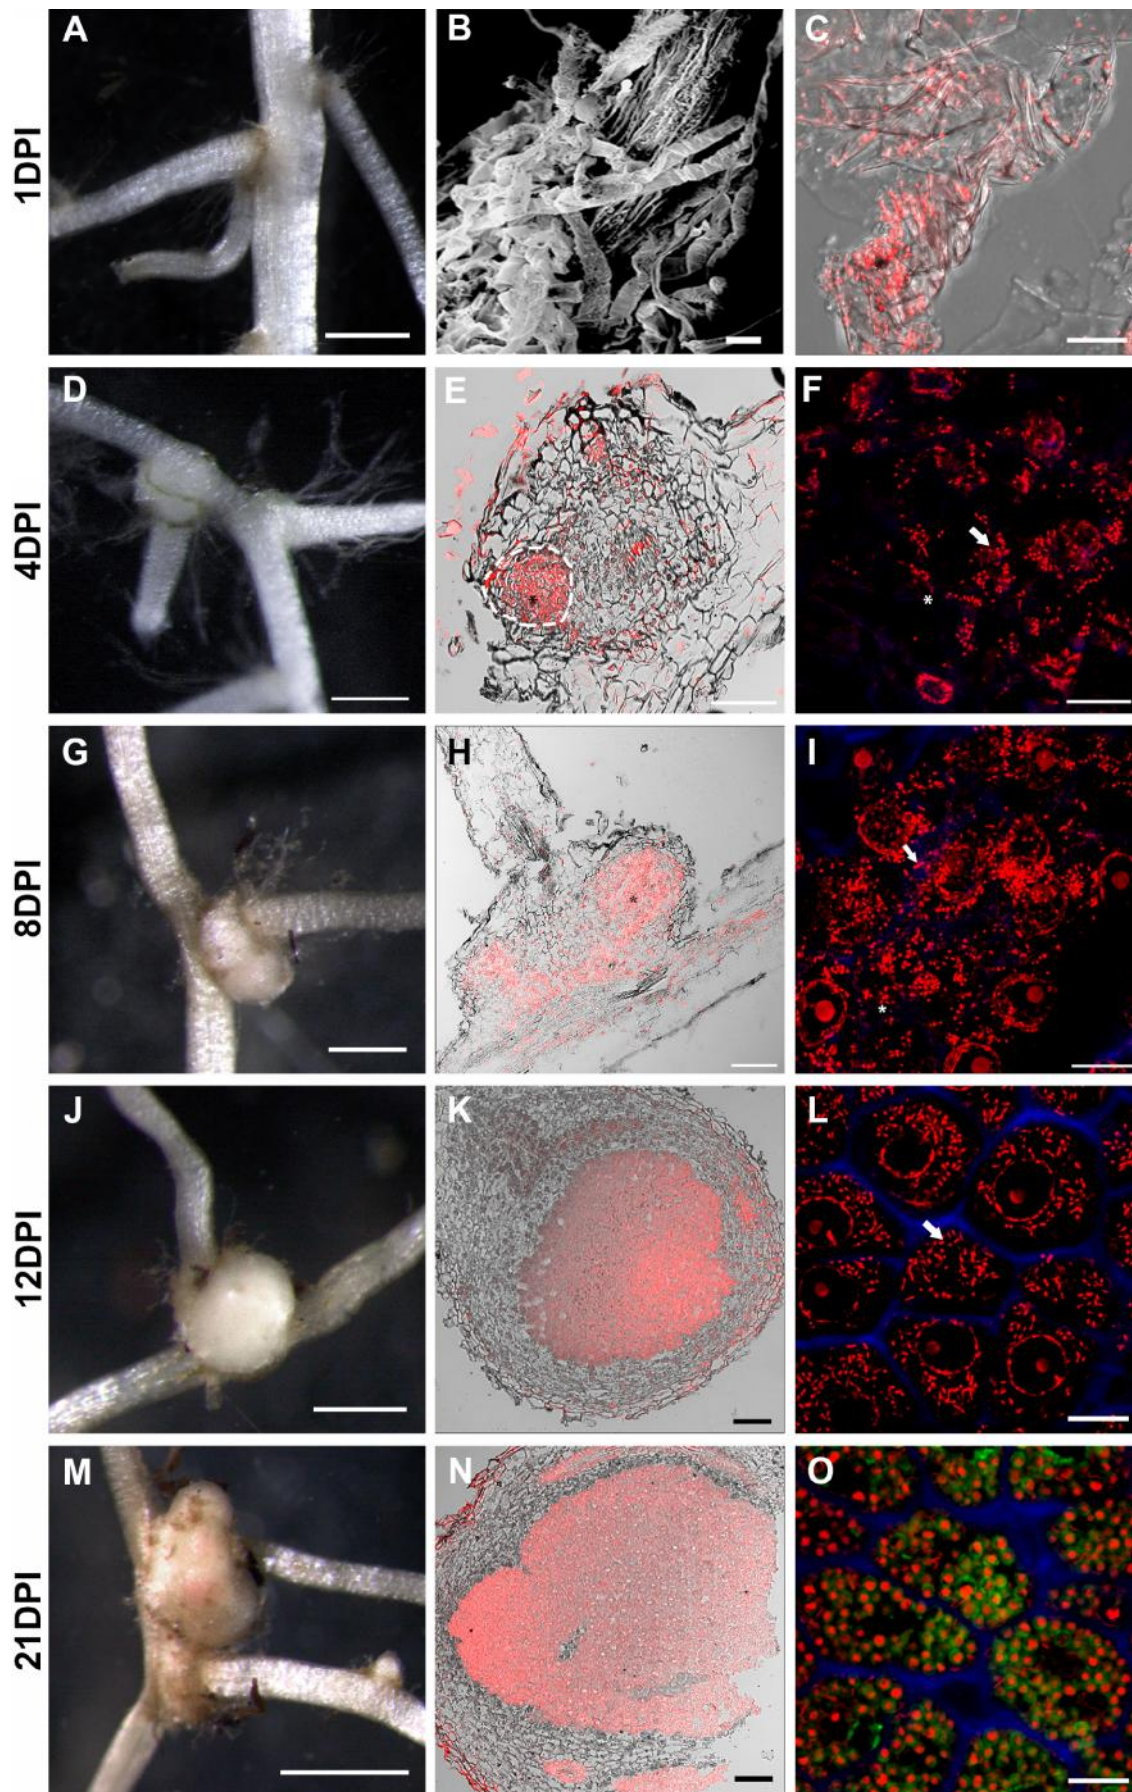

532 **Figure2:**

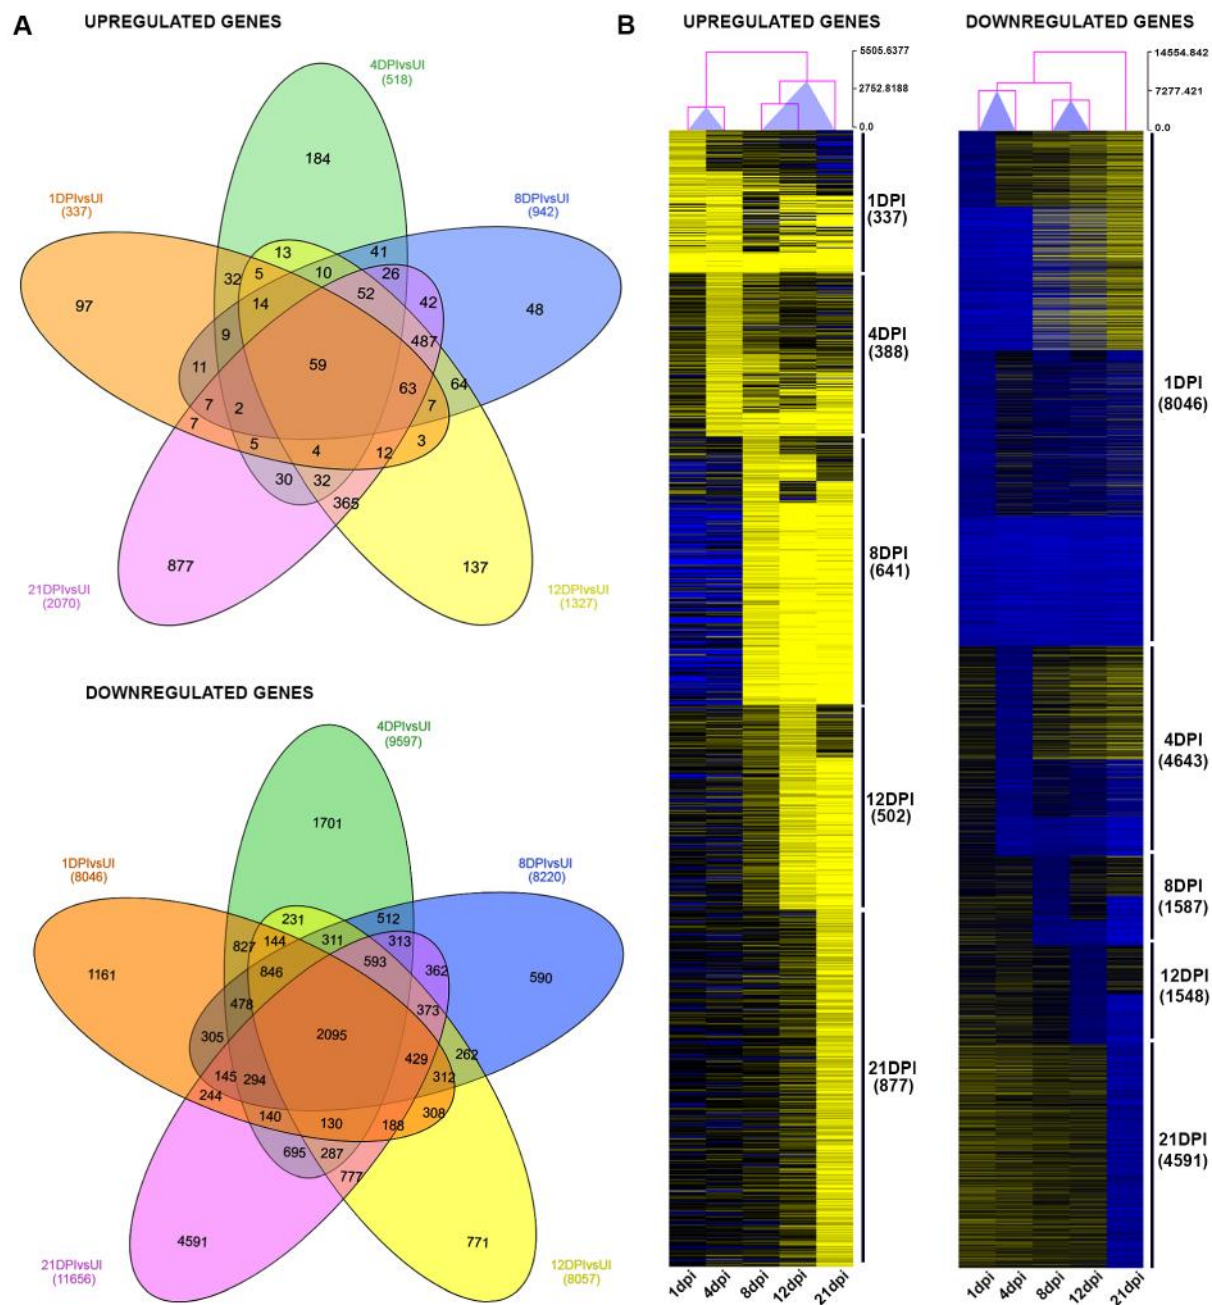







534 **Figure4:**

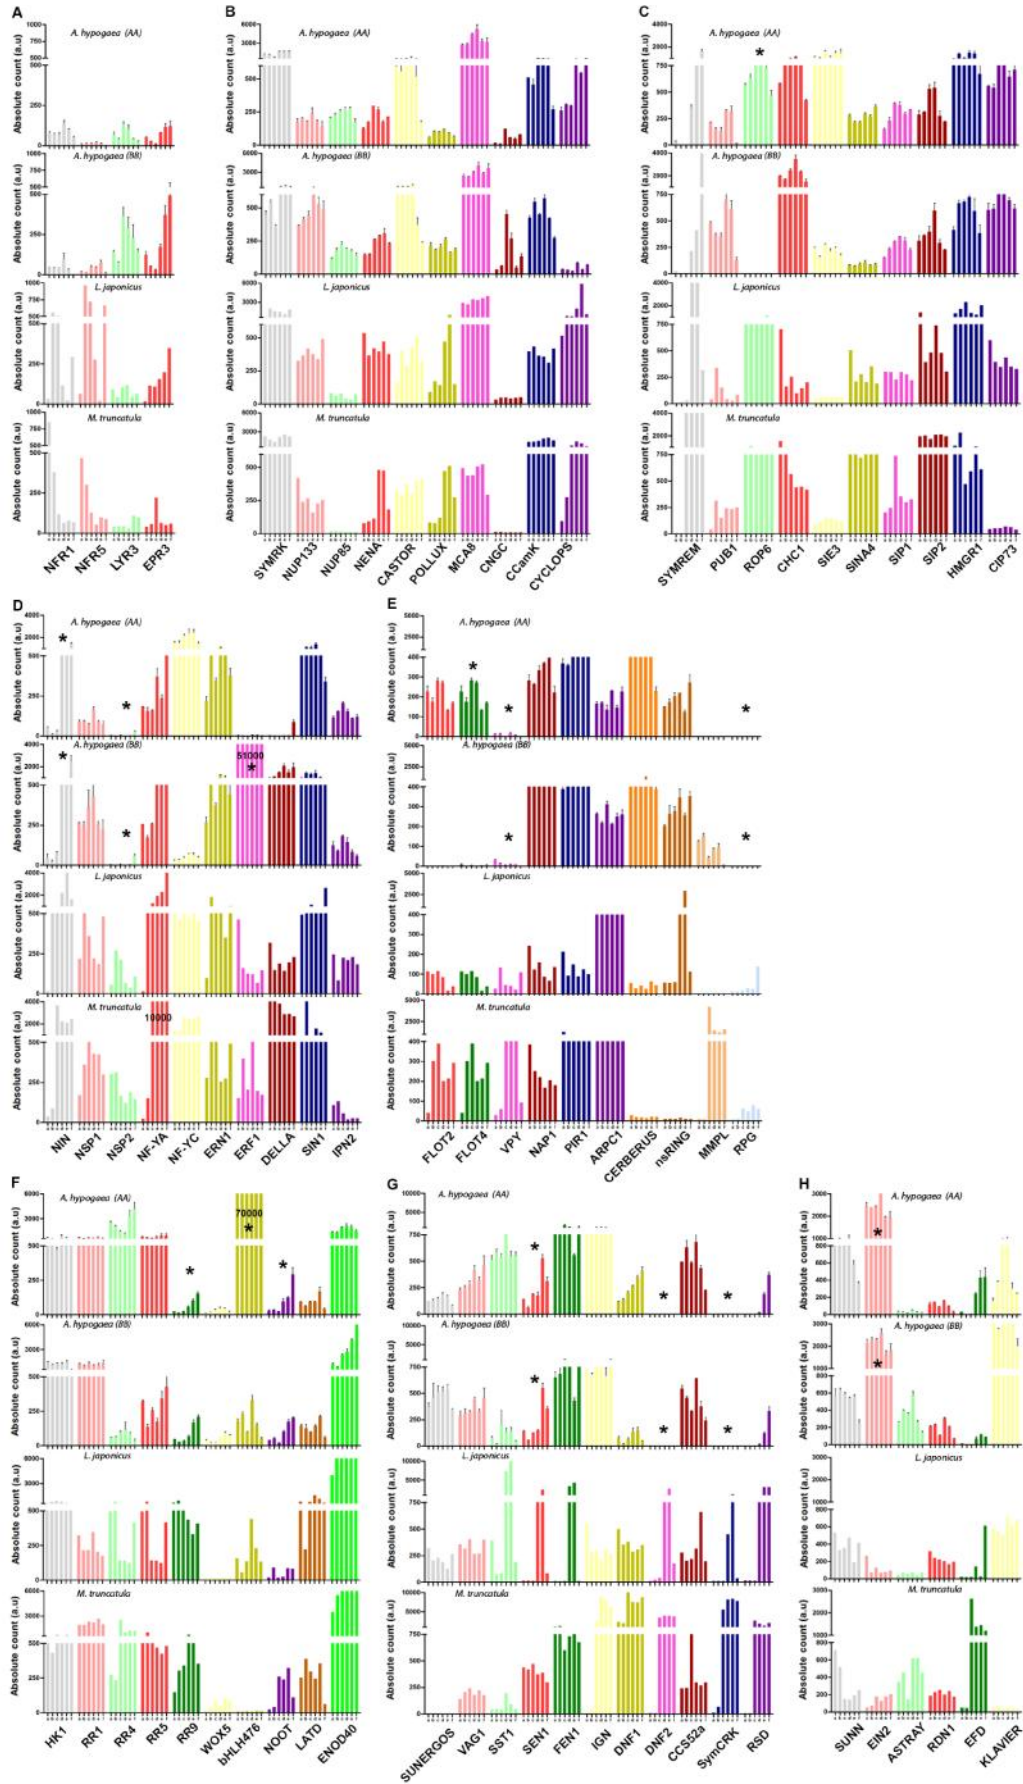

535 **Figure5:**

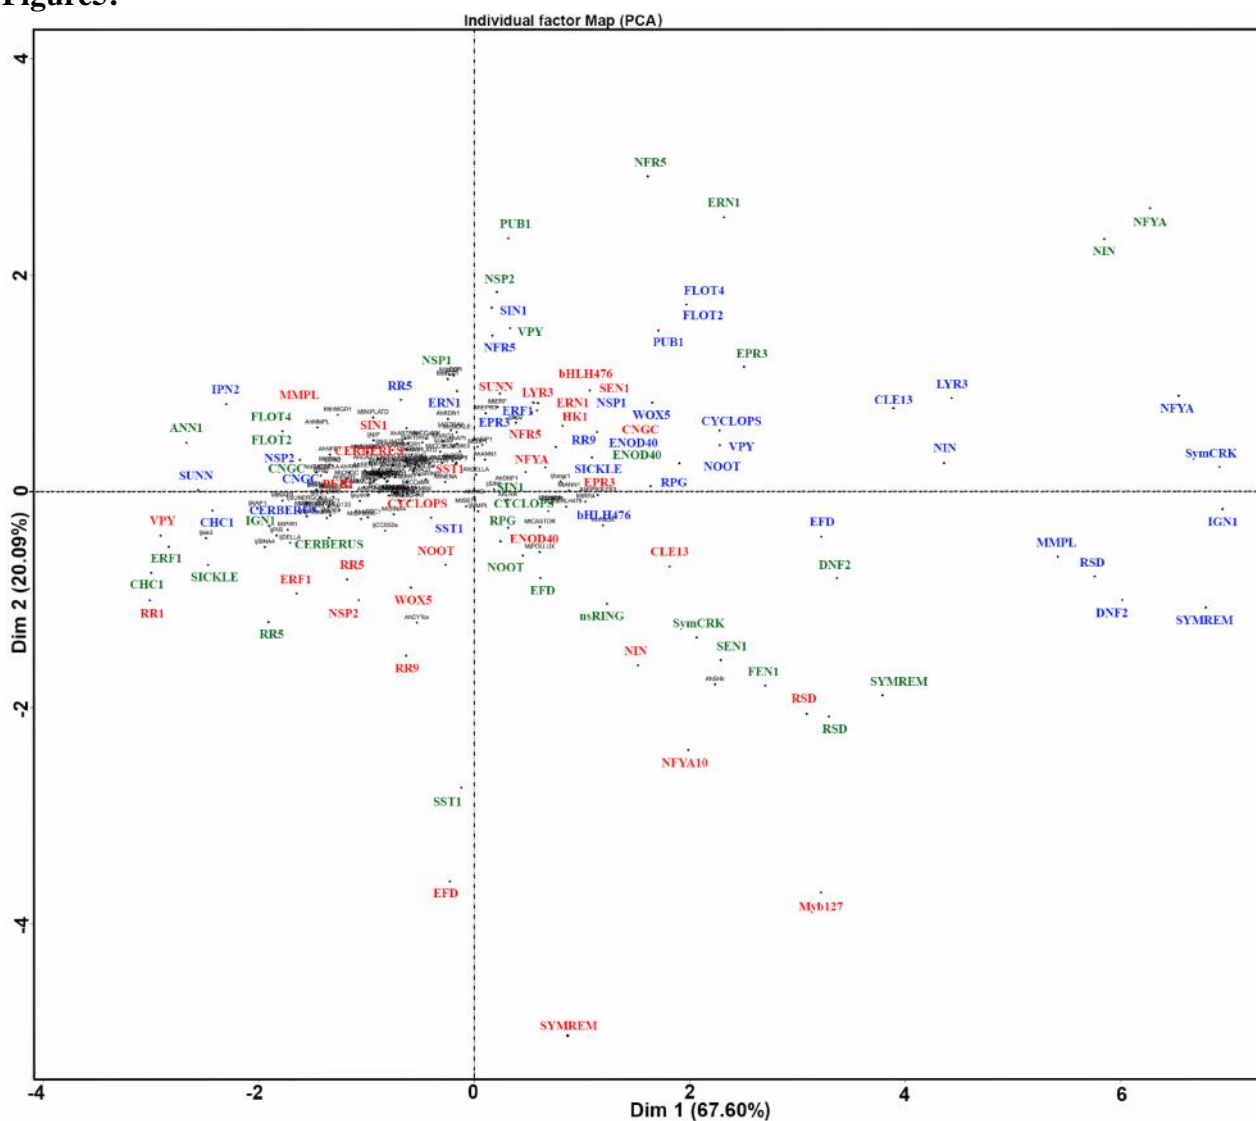

536 **Figure6:**

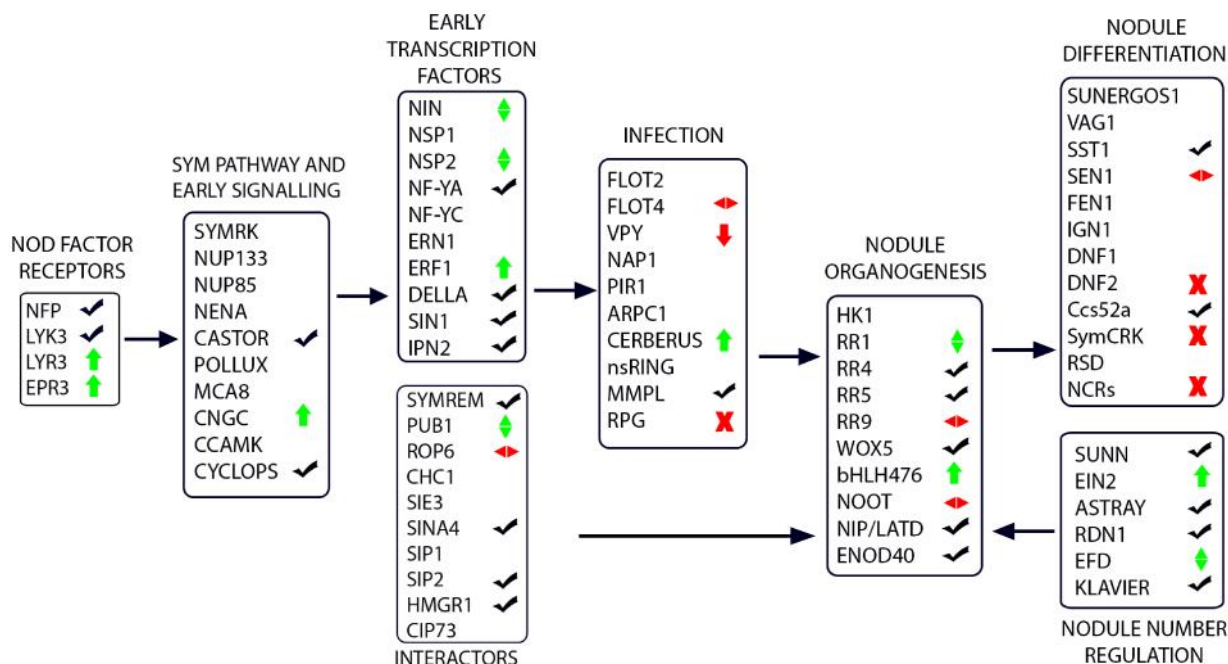

537 **Table and Figure legends:**

538 **Table 1: Summary of Raw Illumina Sequencing and filtered reads after trimming and**  
 539 **alignment of reads to AA (*Arachis duranensis*) and BB (*Arachis ipaensis*) genomes in each**  
 540 **library**

| 541<br>542<br>543<br>544<br>545 | Samples | Raw Reads | Filter reads (%) | % of Total Mapped Reads               |                                     |
|---------------------------------|---------|-----------|------------------|---------------------------------------|-------------------------------------|
|                                 |         |           |                  | <i>Arachis duranensis</i> (AA Genome) | <i>Arachis ipaensis</i> (BB Genome) |
| 546                             | UI      | 57913214  | 95.08%           | 82.96%                                | 86.71%                              |
| 547                             |         | 65769652  | 94.88%           | 87.78%                                | 84.34%                              |
| 548                             |         | 85558982  | 90.59%           | 85.29%                                | 86.19%                              |
| 549                             | 1DPI    | 61747256  | 95.00%           | 88.80%                                | 87.51%                              |
| 550                             |         | 62925897  | 91.38%           | 88.78%                                | 89.98%                              |
| 551                             |         | 74542718  | 91.68%           | 87.85%                                | 88.76%                              |
| 552                             | 4DPI    | 96807458  | 89.21%           | 88.46%                                | 84.42%                              |
| 553                             |         | 97275402  | 90.46%           | 86.61%                                | 87.71%                              |
| 554                             |         | 79984160  | 91.21%           | 85.24%                                | 86.25%                              |
| 555                             | 8DPI    | 89987084  | 90.09%           | 86.03%                                | 87.19%                              |
| 556                             |         | 11535441  | 89.85%           | 86.20%                                | 83.03%                              |
| 557                             |         | 77031650  | 91.50%           | 87.81%                                | 88.95%                              |
| 558                             | 12DPI   | 57198145  | 90.28%           | 86.77%                                | 88.08%                              |
| 559                             |         | 74743668  | 92.33%           | 88.47%                                | 89.71%                              |
| 560                             |         | 96613689  | 89.38%           | 86.12%                                | 87.20%                              |
|                                 | 21DPI   | 65329428  | 90.03%           | 87.81%                                | 86.81%                              |
|                                 |         | 100254251 | 90.71%           | 84.45%                                | 85.42%                              |
|                                 |         | 70839550  | 90.46%           | 80.15%                                | 81.44%                              |

561 **FIGURE LEGENDS:**

562 **Figure 1: *Arachis hypogaea* nodule ontogeny at different time point post inoculation with**  
563 ***Bradyrhizobium* sp. SEMIA6144.** (A-C) Root harvested 1 day post inoculation (1DPI) where (A)  
564 root junction, (B) SEM of inoculated root hair at lateral root junction and (C) CLSM image of  
565 lateral root junction. Section of nodule primordia at (D-F) 4DPI and (G-I) 8DPI. Section of nodule  
566 at (J-L) 12DPI and (M-O) 21DPI. Dashed lines delimit the infection zone in E and asterix indicate  
567 the precise position. Arrow indicate rod shaped rhizobia in F, I and L. Stereoimage (A, D, G, J  
568 and M); bright field and PI merged (C, E, H, K and N); PI + Calcofluor merged (F, I and L); PI +  
569 Calcofluor + syto9 merged (O). Scale bar: 500 $\mu$ m (A, D, G and J), 1mm (M), 2 $\mu$ m (B), 100 $\mu$ m (E,  
570 H, K and N) and 10 $\mu$ m (F, I, L and O). PI (red), Calcofluor (blue) and Syto9 (green).

571 **Figure 2: Comparison of differentially expressed genes (DEGs) identified in the five time**  
572 **points 1DPI, 4DPI, 8DPI, 12DPI and 21DPI.** The total DEGs were identified by EdgeR analysis  
573 where (A) Interactive Venn-diagram shows the comparison between Up-regulated genes and  
574 Down-regulated genes (from both AA and BB). (B) Heat map of the hierarchical cluster analysis  
575 of the Up-regulated genes and Down-regulated genes (both AA and BB). The columns indicating  
576 the different time points above the map and the arborescence indicate the similarity among  
577 transcriptomes. Below the heat map is a color coded scale bar for the relative expression levels of  
578 genes in log<sub>2</sub> scale. Numbers beside the heat-map indicates the exclusive number of DEGs at  
579 different time point (see Supplementary Table 2).

580 **Figure 3: DEGs associated to plant-pathogen interaction and jasmonic acid-salicylic acid**  
581 **signaling across different time points post inoculation.** (A) KEGG analysis of upregulated  
582 (green) and downregulated (red) DEGs in the respective pathways. (B) Heat-map of the DEGs  
583 that are previously annotated in KEGG pathway analysis. (C) Neighbour-joining phylogenetic tree  
584 of all the annotated CAP proteins using non-truncated amino acid sequences where green branch  
585 denotes divergent upregulated CAP-PR1 proteins. (D) CLUSTALW sequence alignment of CAPE  
586 peptides using Multalin where arrow indicates cleavage site for CAPE peptide, CBM and CAP  
587 domain are annotated by colored box and bullet indicates *A. hypogaea* CAP peptides  
588 (upregulated:green and downregulated:red).

589 **Figure 4: Comparative Expression Pattern of 71 Symbiotic genes in *Arachis hypogaea*,**  
590 ***Medicago truncatula* and *Lotus japonicus*.** For *A. hypogaea* histogram represent normalized  
591 RNA-seq reads (FPKM) of symbiotic orthologous genes aligned with AA and BB genome of *A.*

592 *duranensis* and *A. ipaensis* respectively. For *Medicago truncatula* and *Lotus japonicus* histogram  
593 represent microarray data retrieved from the respective Gene Expression Atlas Affymetrix  
594 database (MtGEA, LjGEA; Benedito et al., 2008). Relative expression level data of symbiotic  
595 genes (in arbitrary units, a.u.) during nodulation kinetics are grouped as (A) Nod factor receptors,  
596 (B) SYM pathway and early signaling, (C) Interactors, (D) Early transcription factors, (E)  
597 Infection, (F) Nodule organogenesis, (G) Nodule differentiation, (H) Nodule number regulation  
598 (dpi: days post inoculation by *Bradyrhizobium sp.* SEMIA6144 for *A. hypogaea*, *Sinorhizobium*  
599 *meliloti* for *M. truncatula* and *Mesorhizobium loti* strain R7A for *L. japonicus*). a,b,c,d,e and f in  
600 x-axis represented UI,1,4,8,12 and 21DPI respectively for *A. hypogaea*; UI,3,6,10,14 and 20DPI  
601 respectively for *M. truncatula*; UI,1,3,7,14 and 21DPI respectively for *L. japonicus*.

602 **Figure 5: Individual Factor map Principal Component Analysis (PCA) of differentially**  
603 **expressed Symbiotic genes.** *A. hypogaea* (red), *M. truncatula* (blue) and *L. japonicus* (green)  
604 genes are highlighted by a single acronym. Detail of the genes is mentioned in Supplementary  
605 Table 5. % of genes represented in Dim 1(dimension 1) and Dim 2 (dimension 2).

606 **Figure 6: Simplified molecular model for the symbiotic signaling pathway in legume.**  
607 Homologous symbiotic genes identified in *M. truncatula* and *L. japonicus* are listed and classified  
608 according to their main symbiotic functions. *A. hypogaea* putative orthologous genes are  
609 annotated by Black tick: Differentially expressed, Green up-headarrow: upregulation, Red down-  
610 headarrow: downregulation, Red Cross: absent in diploid genome, Green up-down triangle:  
611 divergent expression, Red sideways triangle: phylogenetically divergent.

612

#### 613 **Author's Contribution:**

614 Project planning: A.K. and M.D.G. Sample preparation: K.K. and A.K.; Microscopy of symbiosis: A.K.;  
615 Preparation of RNA: K.K. Production of Illumina libraries, sequencing and transcriptome assembly: E.D,  
616 D.S.; Analysis of transcriptome: K.K. and A.Z.; Analysis of symbiotic transcriptome: K.K and A.K.;  
617 Critical analysis of data : P.C and F.C. Writing of the manuscript: A.K., K.K. and M.D.G. All authors  
618 approved the manuscript.

619

#### 620 **Acknowledgement:**

621 This work was funded by Grants from Govt. of India: IFCPAR/CEFIPRA (IFC/5103-  
622 4/2014/543); DBT-CEIB (Centre of Excellence and Innovation in Biotechnology,



623 BT/01/CEIB/09/VI/10); DBT-IPLS (BT/PR14552/INF/22/123/2010; fellowship to K.K and  
624 A.Z.R (IFCPAR/CEFIPRA: IFC/5103-4/2014/543); fellowship to A.K (Council of Scientific and  
625 Industrial Research, CSIR-09/028[0756]/2009–EMR–I).

626

627

## 628 REFERENCES

629 Ané, J.-M., Kiss, G.B., Riely, B.K., Penmetsa, R.V., Oldroyd, G.E., Ajax, C., Lévy, J., Debelle, F., Baek, J.-M.,  
630 and Kalo, P. 2004. Medicago truncatula DMI1 required for bacterial and fungal symbioses in  
631 legumes. *Science* 303:1364-1367.

632 Ariel, F., Brault-Hernandez, M., Laffont, C., Huault, E., Brault, M., Plet, J., Moison, M., Blanchet, S.,  
633 Ichanté, J.L., and Chabaud, M. 2012. Two direct targets of cytokinin signaling regulate symbiotic  
634 nodulation in *Medicago truncatula*. *The Plant Cell* 24:3838-3852.

635 Arrighi, J.F. 2006. The *Medicago truncatula* Lysine Motif-Receptor-Like Kinase Gene Family Includes NFP  
636 and New Nodule-Expressed Genes. *Plant physiology* 142:265-279.

637 Arrighi, J.F., Godfroy, O., de Billy, F., Saurat, O., Jauneau, A., and Gough, C. 2008. The RPG gene of  
638 *Medicago truncatula* controls *Rhizobium*-directed polar growth during infection. *Proceedings of*  
639 *the National Academy of Sciences* 105:9817-9822.

640 Asamizu, E., Shimoda, Y., Kouchi, H., Tabata, S., and Sato, S. 2008. A Positive Regulatory Role for LjERF1 in  
641 the Nodulation Process Is Revealed by Systematic Analysis of Nodule-Associated Transcription  
642 Factors of *Lotus japonicus*. *Plant physiology* 147:2030-2040.

643 Ashburner, M., Ball, C.A., Blake, J.A., Botstein, D., Butler, H., Cherry, J.M., Davis, A.P., Dolinski, K., Dwight,  
644 S.S., and Eppig, J.T. 2000. Gene Ontology: tool for the unification of biology. *Nature genetics*  
645 25:25-29.

646 Battaglia, M., Rípodas, C., Clúa, J., Baudin, M., Aguilar, O.M., Niebel, A., Zanetti, M.E., and Blanco, F.A.  
647 2014. A nuclear factor Y interacting protein of the GRAS family is required for nodule  
648 organogenesis, infection thread progression, and lateral root growth. *Plant physiology* 164:1430-  
649 1442.

650 Benedito, V.A., Torres-Jerez, I., Murray, J.D., Andriankaja, A., Allen, S., Kakar, K., Wandrey, M., Verdier, J.,  
651 Zuber, H., and Ott, T. 2008. A gene expression atlas of the model legume *Medicago truncatula*.  
652 *The Plant Journal* 55:504-513.

653 Berrabah, F., Bourcy, M., Eschstruth, A., Cayrel, A., Guefrachi, I., Mergaert, P., Wen, J., Jean, V., Mysore,  
654 K.S., Gourion, B., and Ratet, P. 2014. A nonRD receptor-like kinase prevents nodule early  
655 senescence and defense-like reactions during symbiosis. *New Phytologist* 203:1305-1314.



- 656 Bertoli, D.J., Cannon, S.B., Froenicke, L., Huang, G., Farmer, A.D., Cannon, E.K., Liu, X., Gao, D., Clevenger,  
657 J., and Dash, S. 2015. The genome sequences of *Arachis duranensis* and *Arachis ipaensis*, the  
658 diploid ancestors of cultivated peanut. *Nature Genetics* 47:438.
- 659 Bolger, A.M., Lohse, M., and Usadel, B. 2014. Trimmomatic: a flexible trimmer for Illumina sequence data.  
660 *Bioinformatics* 30:2114-2120.
- 661 Booger, F.C., and Rossum, D. 1997. Nodulation of groundnut by *Bradyrhizobium*: a simple infection  
662 process by crack entry. *FEMS microbiology reviews* 21:5-27.
- 663 Bourcy, M., Brocard, L., Pislariu, C.I., Cosson, V., Mergaert, P., Tadege, M., Mysore, K.S., Udvardi, M.K.,  
664 Gourion, B., and Ratet, P. 2013. *Medicago truncatula* DNF2 is a PI-PLC-XD-containing protein  
665 required for bacteroid persistence and prevention of nodule early senescence and defense-like  
666 reactions. *New Phytologist* 197:1250-1261.
- 667 Breen, S., Williams, S.J., Outram, M., Kobe, B., and Solomon, P.S. 2017. Emerging insights into the  
668 functions of pathogenesis-related protein 1. *Trends in plant science* 22:871-879.
- 669 Cerri, M.R., Wang, Q., Stolz, P., Folgmann, J., Frances, L., Katzer, K., Li, X., Heckmann, A.B., Wang, T.L., and  
670 Downie, J.A. 2017. The ERN1 transcription factor gene is a target of the CCaMK/CYCLOPS complex  
671 and controls rhizobial infection in *Lotus japonicus*. *New Phytologist* 215:323-337.
- 672 Chaintreuil, C., Rivallan, R., Bertoli, D.J., Klopp, C., Gouzy, J., Courtois, B., Leleux, P., Martin, G., Rami, J.-F.,  
673 Gully, D., Parrinello, H., Séverac, D., Patrel, D., Fardoux, J., Ribière, W., Boursot, M., Cartieaux, F.,  
674 Czernic, P., Ratet, P., Mournet, P., Giraud, E., and Arrighi, J.-F. 2016. A gene-based map of the Nod  
675 factor-independent *Aeschynomene eveni* sheds new light on the evolution of nodulation and  
676 legume genomes. *DNA Research* 23:365-376.
- 677 CHANDLER, M.R., Date, R., and Roughley, R. 1982. Infection and root-nodule development in *Stylosanthes*  
678 species by *Rhizobium*. *Journal of Experimental Botany* 33:47-57.
- 679 Charpentier, M., Sun, J., Martins, T.V., Radhakrishnan, G.V., Findlay, K., Soumpourou, E., Thouin, J., Véry,  
680 A.-A., Sanders, D., and Morris, R.J. 2016. Nuclear-localized cyclic nucleotide-gated channels  
681 mediate symbiotic calcium oscillations. *Science* 352:1102-1105.
- 682 Couzigou, J.-M., Zhukov, V., Mondy, S., el Heba, G.A., Cosson, V., Ellis, T.N., Ambrose, M., Wen, J., Tadege,  
683 M., and Tikhonovich, I. 2012. NODULE ROOT and COCHLEATA maintain nodule development and  
684 are legume orthologs of *Arabidopsis* BLADE-ON-PETIOLE genes. *The Plant Cell* 24:4498-4510.
- 685 Crespi, M.D., Jurkevitch, E., Poiret, M., d'Aubenton-Carafa, Y., Petrovics, G., Kondorosi, E., and Kondorosi,  
686 A. 1994. *enod40*, a gene expressed during nodule organogenesis, codes for a non-translatable  
687 RNA involved in plant growth. *EMBO J* 13:5099-5112.

- 688 Czernic, P., Gully, D., Cartieaux, F., Moulin, L., Patrel, D., Pierre, O., Fardoux, J., Chaintreuil, C., Nguyen, P.,  
689 and Gressent, F. 2015. Convergent evolution of endosymbiont differentiation in Dalbergioid and  
690 IRLC legumes mediated by nodule-specific cysteine-rich peptides. *Plant physiology*:pp.  
691 00584.02015.
- 692 Dash, S., Cannon, E., Kalberer, S., Farmer, A., Cannon, S., Wilson, R., and Stalker, T. 2016. PeanutBase and  
693 other bioinformatic resources for peanut. *Peanuts: Genetics, Processing, & Utilization*. AOCS  
694 Press, Urbana, IL:241-253.
- 695 Elise, S., Etienne-Pascal, J., de Fernanda, C.-N., Gérard, D., and Julia, F. 2005. The *Medicago truncatula*  
696 SUNN Gene Encodes a CLV1-like Leucine-rich Repeat Receptor Kinase that Regulates Nodule  
697 Number and Root Length. *Plant Molecular Biology* 58:809-822.
- 698 Endre, G., Kereszt, A., Kevei, Z., Mihacea, S., Kaló, P., and Kiss, G.B. 2002. A receptor kinase gene  
699 regulating symbiotic nodule development. *Nature* 417:962-966.
- 700 Fabre, S., Gully, D., Poitout, A., Patrel, D., Arrighi, J.F., Giraud, E., Czernic, P., and Cartieaux, F. 2015. Nod  
701 Factor-Independent Nodulation in *Aeschynomene evenia* Required the Common Plant-Microbe  
702 Symbiotic Toolkit. *Plant Physiol* 169:2654-2664.
- 703 Fliegmann, J., Canova, S., Lachaud, C., Uhlenbroich, S., Gascioli, V., Pichereaux, C., Rossignol, M.,  
704 Rosenberg, C., Cumener, M., and Pitorre, D. 2013. Lipo-chitooligosaccharidic symbiotic signals are  
705 recognized by LysM receptor-like kinase LYR3 in the legume *Medicago truncatula*. *ACS chemical*  
706 *biology* 8:1900-1906.
- 707 Fuller, C.W. (1995). Cycle sequencing with non-thermostable DNA polymerases (Google Patents).
- 708 Gage, D.J. 2004. Infection and invasion of roots by symbiotic, nitrogen-fixing rhizobia during nodulation of  
709 temperate legumes. *Microbiol Mol Biol Rev* 68:280-300.
- 710 Geurts, R., and Bisseling, T. 2002. Rhizobium Nod factor perception and signalling. *The Plant Cell* 14:S239-  
711 S249.
- 712 Giraud, E., Moulin, L., Vallenet, D., Barbe, V., Cytryn, E., Avarre, J.C., Jaubert, M., Simon, D., Cartieaux, F.,  
713 Prin, Y., Bena, G., Hannibal, L., Fardoux, J., Kojadinovic, M., Vuillet, L., Lajus, A., Cruveiller, S.,  
714 Rouy, Z., Mangenot, S., Segurens, B., Dossat, C., Franck, W.L., Chang, W.S., Saunders, E., Bruce, D.,  
715 Richardson, P., Normand, P., Dreyfus, B., Pignol, D., Stacey, G., Emerich, D., Vermeglio, A.,  
716 Medigue, C., and Sadowsky, M. 2007. Legumes symbioses: absence of Nod genes in  
717 photosynthetic bradyrhizobia. *Science* 316:1307-1312.
- 718 Gonzalez-Rizzo, S., Crespi, M., and Frugier, F. 2006a. The *Medicago truncatula* CRE1 Cytokinin Receptor  
719 Regulates Lateral Root Development and Early Symbiotic Interaction with *Sinorhizobium meliloti*.  
720 *The Plant Cell Online* 18:2680-2693.

- 721 Gonzalez-Rizzo, S., Crespi, M., and Frugier, F. 2006b. The *Medicago truncatula* CRE1 cytokinin receptor  
722 regulates lateral root development and early symbiotic interaction with *Sinorhizobium meliloti*.  
723 *Plant Cell* 18:2680-2693.
- 724 Grabherr, M.G., Haas, B.J., Yassour, M., Levin, J.Z., Thompson, D.A., Amit, I., Adiconis, X., Fan, L.,  
725 Raychowdhury, R., and Zeng, Q. 2011. Full-length transcriptome assembly from RNA-Seq data  
726 without a reference genome. *Nature biotechnology* 29:644-652.
- 727 Hakoyama, T., Niimi, K., Yamamoto, T., Isobe, S., Sato, S., Nakamura, Y., Tabata, S., Kumagai, H., Umehara,  
728 Y., Brossuleit, K., Petersen, T.R., Sandal, N., Stougaard, J., Udvardi, M.K., Tamaoki, M., Kawaguchi,  
729 M., Kouchi, H., and Sukanuma, N. 2012. The Integral Membrane Protein SEN1 is Required for  
730 Symbiotic Nitrogen Fixation in *Lotus japonicus* Nodules. *Plant and Cell Physiology* 53:225-236.
- 731 Hakoyama, T., Niimi, K., Watanabe, H., Tabata, R., Matsubara, J., Sato, S., Nakamura, Y., Tabata, S., Jichun,  
732 L., Matsumoto, T., Tatsumi, K., Nomura, M., Tajima, S., Ishizaka, M., Yano, K., Imaizumi-Anraku,  
733 H., Kawaguchi, M., Kouchi, H., and Sukanuma, N. 2009. Host plant genome overcomes the lack of  
734 a bacterial gene for symbiotic nitrogen fixation. *Nature* 462:514-517.
- 735 Haney, C.H., and Long, S.R. 2009. Plant flotillins are required for infection by nitrogen-fixing bacteria.  
736 *Proceedings of the National Academy of Sciences* 107:478-483.
- 737 Haney, C.H., and Long, S.R. 2010. Plant flotillins are required for infection by nitrogen-fixing bacteria.  
738 *Proceedings of the National Academy of Sciences* 107:478-483.
- 739 Haynes, J.G., Czymbek, K.J., Carlson, C.A., Veereshlingam, H., Dickstein, R., and Sherrier, D.J. 2004. Rapid  
740 analysis of legume root nodule development using confocal microscopy. *New Phytologist*  
741 163:661-668.
- 742 Heberle, H., Meirelles, G.V., da Silva, F.R., Telles, G.P., and Minghim, R. 2015. InteractiVenn: a web-based  
743 tool for the analysis of sets through Venn diagrams. *BMC bioinformatics* 16:169.
- 744 Hossain, M.S., Liao, J., James, E.K., Sato, S., Tabata, S., Jurkiewicz, A., Madsen, L.H., Stougaard, J., Ross, L.,  
745 and Szczygłowski, K. 2012. *Lotus japonicus* ARPC1 Is Required for Rhizobial Infection. *Plant*  
746 *physiology* 160:917-928.
- 747 Howe, E.A., Sinha, R., Schlauch, D., and Quackenbush, J. 2011. RNA-Seq analysis in MeV. *Bioinformatics*  
748 27:3209-3210.
- 749 Ibáñez, F., and Fabra, A. 2011. Rhizobial Nod factors are required for cortical cell division in the nodule  
750 morphogenetic programme of the Aeschynomeneae legume *Arachis*. *Plant Biology* 13:794-800.
- 751 Imaizumi-Anraku, H., Takeda, N., Charpentier, M., Perry, J., Miwa, H., Umehara, Y., Kouchi, H., Murakami,  
752 Y., Mulder, L., and Vickers, K. 2005. Plastid proteins crucial for symbiotic fungal and bacterial  
753 entry into plant roots. *Nature* 433:527-531.

- 754 Jardinaud, M.-F., Boivin, S., Rodde, N., Catrice, O., Kisiala, A., Lepage, A., Moreau, S., Roux, B., Cottret, L.,  
755 and Sallet, E. 2016. A laser dissection-RNAseq analysis highlights the activation of cytokinin  
756 pathways by nod factors in the medicago truncatula root epidermis. *Plant physiology* 171:2256-  
757 2276.
- 758 Jin, Y., Liu, H., Luo, D., Yu, N., Dong, W., Wang, C., Zhang, X., Dai, H., Yang, J., and Wang, E. 2016. DELLA  
759 proteins are common components of symbiotic rhizobial and mycorrhizal signalling pathways.  
760 *Nature communications* 7.
- 761 Kaló, P., Gleason, C., Edwards, A., Marsh, J., Mitra, R.M., Hirsch, S., Jakab, J., Sims, S., Long, S.R., and  
762 Rogers, J. 2005. Nodulation signaling in legumes requires NSP2, a member of the GRAS family of  
763 transcriptional regulators. *Science* 308:1786-1789.
- 764 Kanamori, N., Madsen, L.H., Radutoiu, S., Frantescu, M., Quistgaard, E.M., Miwa, H., Downie, J.A., James,  
765 E.K., Felle, H.H., and Haaning, L.L. 2006. A nucleoporin is required for induction of Ca<sup>2+</sup> spiking in  
766 legume nodule development and essential for rhizobial and fungal symbiosis. *Proceedings of the*  
767 *National Academy of Sciences of the United States of America* 103:359-364.
- 768 Kanehisa, M., and Goto, S. 2000. KEGG: kyoto encyclopedia of genes and genomes. *Nucleic acids research*  
769 28:27-30.
- 770 Kang, H., Zhu, H., Chu, X., Yang, Z., Yuan, S., Yu, D., Wang, C., Hong, Z., and Zhang, Z. 2011. A Novel  
771 Interaction between CCaMK and a Protein Containing the Scythe\_N Ubiquitin-Like Domain in  
772 *Lotus japonicus*. *Plant physiology* 155:1312-1324.
- 773 Kang, H., Chu, X., Wang, C., Xiao, A., Zhu, H., Yuan, S., Yang, Z., Ke, D., Xiao, S., Hong, Z., and Zhang, Z.  
774 2014. A MYB coiled-coil transcription factor interacts with NSP2 and is involved in nodulation  
775 in *Lotus japonicus*. *New Phytologist* 201:837-849.
- 776 Kassaw, T., Nowak, S., Schnabel, E., and Frugoli, J.A. 2017. ROOT DETERMINED NODULATION1 is required  
777 for *M. truncatula* CLE12, but not CLE13 peptide signaling through the SUNN receptor kinase. *Plant*  
778 *physiology*:pp. 00278.02017.
- 779 Kawaharada, Y., Kelly, S., Nielsen, M.W., Hjuler, C.T., Gysel, K., Muszyński, A., Carlson, R., Thygesen, M.B.,  
780 Sandal, N., and Asmussen, M. 2015. Receptor-mediated exopolysaccharide perception controls  
781 bacterial infection. *Nature* 523:308-312.
- 782 Kent, W.J. 2002. BLAT—the BLAST-like alignment tool. *Genome research* 12:656-664.
- 783 Kistner, C., and Parniske, M. 2002. Evolution of signal transduction in intracellular symbiosis. *Trends in*  
784 *plant science* 7:511-518.
- 785 Krusell, L. 2005. The Sulfate Transporter SST1 Is Crucial for Symbiotic Nitrogen Fixation in *Lotus japonicus*  
786 Root Nodules. *The Plant Cell Online* 17:1625-1636.

- 787 Kundu, A., and DasGupta, M. 2017a. Silencing of putative cytokinin receptor Histidine Kinase1 inhibits  
788 both inception and differentiation of root nodules in *Arachis hypogaea*. *Molecular plant-microbe*  
789 *interactions*.
- 790 Kundu, A., and DasGupta, M. 2017b. Silencing of Putative Cytokinin Receptor Histidine Kinase1 Inhibits  
791 Both Inception and Differentiation of Root Nodules in *Arachis hypogaea*. *Molecular Plant-Microbe*  
792 *Interactions*:MPMI-06-17-0144-R.
- 793 Langmead, B., Trapnell, C., Pop, M., and Salzberg, S.L. 2009. Ultrafast and memory-efficient alignment of  
794 short DNA sequences to the human genome. *Genome biology* 10:R25.
- 795 Lefebvre, B., Timmers, T., Mbengue, M., Moreau, S., Hervé, C., Tóth, K., Bittencourt-Silvestre, J., Klaus, D.,  
796 Deslandes, L., and Godiard, L. 2010. A remorin protein interacts with symbiotic receptors and  
797 regulates bacterial infection. *Proceedings of the National Academy of Sciences* 107:2343-2348.
- 798 Lévy, J., Bres, C., Geurts, R., Chalhoub, B., Kulikova, O., Duc, G., Journet, E.-P., Ané, J.-M., Lauber, E., and  
799 Bisseling, T. 2004. A putative Ca<sup>2+</sup> and calmodulin-dependent protein kinase required for  
800 bacterial and fungal symbioses. *Science* 303:1361-1364.
- 801 Madsen, E.B., Madsen, L.H., Radutoiu, S., Olbryt, M., Rakwalska, M., Szczyglowski, K., Sato, S., Kaneko, T.,  
802 Tabata, S., and Sandal, N. 2003. A receptor kinase gene of the LysM type is involved in  
803 legume perception of rhizobial signals. *Nature* 425:637-640.
- 804 Mbengue, M., Camut, S., de Carvalho-Niebel, F., Deslandes, L., Froidure, S., Klaus-Heisen, D., Moreau, S.,  
805 Rivas, S., Timmers, T., Hervé, C., Cullimore, J., and Lefebvre, B. 2010. The *Medicago truncatula* E3  
806 Ubiquitin Ligase PUB1 Interacts with the LYK3 Symbiotic Receptor and Negatively Regulates  
807 Infection and Nodulation. *The Plant Cell* 22:3474-3488.
- 808 McDowell, J.M., Soyano, T., Kouchi, H., Hirota, A., and Hayashi, M. 2013. NODULE INCEPTION Directly  
809 Targets NF-Y Subunit Genes to Regulate Essential Processes of Root Nodule Development in *Lotus*  
810 *japonicus*. *PLoS Genetics* 9:e1003352.
- 811 Mergaert, P., Uchiumi, T., Alunni, B., Evanno, G., Cheron, A., Catrice, O., Mausset, A.-E., Barloy-Hubler, F.,  
812 Galibert, F., and Kondorosi, A. 2006. Eukaryotic control on bacterial cell cycle and differentiation  
813 in the *Rhizobium*–legume symbiosis. *Proceedings of the National Academy of Sciences of the*  
814 *United States of America* 103:5230-5235.
- 815 Messinese, E., Mun, J.-H., Yeun, L.H., Jayaraman, D., Rougé, P., Barre, A., Lougnon, G., Schornack, S.,  
816 Bono, J.-J., and Cook, D.R. 2007. A novel nuclear protein interacts with the symbiotic DMI3  
817 calcium- and calmodulin-dependent protein kinase of *Medicago truncatula*. *Molecular Plant-*  
818 *Microbe Interactions* 20:912-921.

- 819 Middleton, P.H., Jakab, J., Penmetsa, R.V., Starker, C.G., Doll, J., Kaló, P., Prabhu, R., Marsh, J.F., Mitra,  
820 R.M., and Kereszt, A. 2007. An ERF transcription factor in *Medicago truncatula* that is essential for  
821 Nod factor signal transduction. *The Plant Cell* 19:1221-1234.
- 822 Miyazawa, H., Oka-Kira, E., Sato, N., Takahashi, H., Wu, G.J., Sato, S., Hayashi, M., Betsuyaku, S.,  
823 Nakazono, M., Tabata, S., Harada, K., Sawa, S., Fukuda, H., and Kawaguchi, M. 2010. The receptor-  
824 like kinase KLAVER mediates systemic regulation of nodulation and non-symbiotic shoot  
825 development in *Lotus japonicus*. *Development* 137:4317-4325.
- 826 Murray, J.D., Karas, B.J., Sato, S., Tabata, S., Amyot, L., and Szczyglowski, K. 2007. A cytokinin perception  
827 mutant colonized by *Rhizobium* in the absence of nodule organogenesis. *Science* 315:101-104.
- 828 Murray, J.D., Muni, R.R.D., Torres-Jerez, I., Tang, Y., Allen, S., Andriankaja, M., Li, G., Laxmi, A., Cheng, X.,  
829 and Wen, J. 2011a. Vapyrin, a gene essential for intracellular progression of arbuscular  
830 mycorrhizal symbiosis, is also essential for infection by rhizobia in the nodule symbiosis of  
831 *Medicago truncatula*. *The Plant Journal* 65:244-252.
- 832 Murray, J.D., Muni, R.R.D., Torres-Jerez, I., Tang, Y., Allen, S., Andriankaja, M., Li, G., Laxmi, A., Cheng, X.,  
833 Wen, J., Vaughan, D., Schultze, M., Sun, J., Charpentier, M., Oldroyd, G., Tadege, M., Ratet, P.,  
834 Mysore, K.S., Chen, R., and Udvardi, M.K. 2011b. Vapyrin, a gene essential for intracellular  
835 progression of arbuscular mycorrhizal symbiosis, is also essential for infection by rhizobia in the  
836 nodule symbiosis of *Medicago truncatula*. *The Plant Journal* 65:244-252.
- 837 Nishimura, R., Ohmori, M., Fujita, H., and Kawaguchi, M. 2002. A *Lotus* basic leucine zipper protein with a  
838 RING-finger motif negatively regulates the developmental program of nodulation. *Proceedings of*  
839 *the National Academy of Sciences* 99:15206-15210.
- 840 Oldroyd, G.E., and Downie, J.A. 2004. Calcium, kinases and nodulation signalling in legumes. *Nature*  
841 *reviews. Molecular cell biology* 5:566.
- 842 Oldroyd, G.E., and Downie, J.A. 2006. Nuclear calcium changes at the core of symbiosis signalling. *Current*  
843 *opinion in plant biology* 9:351-357.
- 844 Op den Camp, R.H., De Mita, S., Lillo, A., Cao, Q., Limpens, E., Bisseling, T., and Geurts, R. 2011. A  
845 phylogenetic strategy based on a legume-specific whole genome duplication yields symbiotic  
846 cytokinin type-A response regulators. *Plant Physiol* 157:2013-2022.
- 847 Osipova, M.A., Mortier, V., Demchenko, K.N., Tsyganov, V.E., Tikhonovich, I.A., Lutova, L.A., Dolgikh, E.A.,  
848 and Goormachtig, S. 2012. WUSCHEL-RELATED HOMEBOX5 Gene Expression and Interaction of  
849 CLE Peptides with Components of the Systemic Control Add Two Pieces to the Puzzle of  
850 Autoregulation of Nodulation. *Plant physiology* 158:1329-1341.



- 851 Pawlowski, K., and Bisseling, T. 1996. Rhizobial and actinorhizal symbioses: what are the shared features?  
852 The Plant Cell 8:1899.
- 853 Peng, Z., Liu, F., Wang, L., Zhou, H., Paudel, D., Tan, L., Maku, J., Gallo, M., and Wang, J. 2017.  
854 Transcriptome profiles reveal gene regulation of peanut (*Arachis hypogaea* L.) nodulation.  
855 Scientific Reports 7:40066.
- 856 Perteua, M., Perteua, G.M., Antonescu, C.M., Chang, T.-C., Mendell, J.T., and Salzberg, S.L. 2015. StringTie  
857 enables improved reconstruction of a transcriptome from RNA-seq reads. Nature biotechnology  
858 33:290-295.
- 859 Radutoiu, S., Madsen, L.H., Madsen, E.B., Felle, H.H., Umehara, Y., Grønlund, M., Sato, S., Nakamura, Y.,  
860 Tabata, S., and Sandal, N. 2003. Plant recognition of symbiotic bacteria requires two LysM  
861 receptor-like kinases. Nature 425:585-592.
- 862 Robinson, M.D., McCarthy, D.J., and Smyth, G.K. 2010. edgeR: a Bioconductor package for differential  
863 expression analysis of digital gene expression data. Bioinformatics 26:139-140.
- 864 Saha, S., Dutta, A., Bhattacharya, A., and DasGupta, M. 2014. Intracellular catalytic domain of symbiosis  
865 receptor kinase hyperactivates spontaneous nodulation in absence of rhizobia. Plant Physiol  
866 166:1699-1708.
- 867 Saito, K., Yoshikawa, M., Yano, K., Miwa, H., Uchida, H., Asamizu, E., Sato, S., Tabata, S., Imaizumi-Anraku,  
868 H., and Umehara, Y. 2007. NUCLEOPORIN85 is required for calcium spiking, fungal and bacterial  
869 symbioses, and seed production in *Lotus japonicus*. The Plant Cell 19:610-624.
- 870 Schauser, L., Roussis, A., Stiller, J., and Stougaard, J. 1999a. A plant regulator controlling development of  
871 symbiotic root nodules. Nature 402:191-195.
- 872 Schauser, L., Roussis, A., Stiller, J., and Stougaard, J. 1999b. A plant regulator controlling development of  
873 symbiotic root nodules. Nature 402:191-195.
- 874 Shimomura, K., Nomura, M., Tajima, S., and Kouchi, H. 2006. LjnsRING, a Novel RING Finger Protein, is  
875 Required for Symbiotic Interactions Between  
876 *Mesorhizobium loti*  
877 and  
878 *Lotus japonicus*. Plant and Cell Physiology 47:1572-1581.
- 879 Singh, S., Katzer, K., Lambert, J., Cerri, M., and Parniske, M. 2014. CYCLOPS, a DNA-binding transcriptional  
880 activator, orchestrates symbiotic root nodule development. Cell Host & Microbe 15:139-152.

- 881 Sinharoy, S., and DasGupta, M. 2009. RNA interference highlights the role of CCaMK in dissemination of  
882 endosymbionts in the Aeschynomeneae legume *Arachis*. *Mol Plant Microbe Interact* 22:1466-  
883 1475.
- 884 Sinharoy, S., Torres-Jerez, I., Bandyopadhyay, K., Kereszt, A., Pislariu, C.I., Nakashima, J., Benedito, V.A.,  
885 Kondorosi, E., and Udvardi, M.K. 2013. The C2H2 transcription factor regulator of symbiosome  
886 differentiation represses transcription of the secretory pathway gene VAMP721a and promotes  
887 symbiosome development in *Medicago truncatula*. *Plant Cell* 25:3584-3601.
- 888 Smit, P., Raedts, J., Portyanko, V., Debelle, F., Gough, C., Bisseling, T., and Geurts, R. 2005. NSP1 of the  
889 GRAS protein family is essential for rhizobial Nod factor-induced transcription. *Science* 308:1789-  
890 1791.
- 891 Smit, P., Limpens, E., Geurts, R., Fedorova, E., Dolgikh, E., Gough, C., and Bisseling, T. 2007. *Medicago*  
892 LYK3, an entry receptor in rhizobial nodulation factor signaling. *Plant physiology* 145:183-191.
- 893 Sprent, J.I., and James, E.K. 2007. Legume evolution: where do nodules and mycorrhizas fit in? *Plant*  
894 *Physiol* 144:575-581.
- 895 Stracke, S., Kistner, C., Yoshida, S., Mulder, L., Sato, S., Kaneko, T., Tabata, S., Sandal, N., Stougaard, J., and  
896 Szczyglowski, K. 2002. A plant receptor-like kinase required for both bacterial and fungal  
897 symbiosis. *Nature* 417:959-962.
- 898 Suzaki, T., Ito, M., Yoro, E., Sato, S., Hirakawa, H., Takeda, N., and Kawaguchi, M. 2014.  
899 Endoreduplication-mediated initiation of symbiotic organ development in *Lotus japonicus*.  
900 *Development* 141:2441-2445.
- 901 Tamura, K., Stecher, G., Peterson, D., Filipski, A., and Kumar, S. 2013. MEGA6: molecular evolutionary  
902 genetics analysis version 6.0. *Molecular biology and evolution* 30:2725-2729.
- 903 Tirichine, L., Imaizumi-Anraku, H., Yoshida, S., Murakami, Y., Madsen, L.H., Miwa, H., Nakagawa, T.,  
904 Sandal, N., Albrechtsen, A.S., Kawaguchi, M., Downie, A., Sato, S., Tabata, S., Kouchi, H., Parniske,  
905 M., Kawasaki, S., and Stougaard, J. 2006. Deregulation of a Ca<sup>2+</sup>/calmodulin-dependent kinase  
906 leads to spontaneous nodule development. *Nature* 441:1153-1156.
- 907 Trapnell, C., Williams, B.A., Pertea, G., Mortazavi, A., Kwan, G., Van Baren, M.J., Salzberg, S.L., Wold, B.J.,  
908 and Pachter, L. 2010. Transcript assembly and quantification by RNA-Seq reveals unannotated  
909 transcripts and isoform switching during cell differentiation. *Nature biotechnology* 28:511-515.
- 910 Van de Velde, W., Zehirov, G., Szatmari, A., Debreczeny, M., Ishihara, H., Kevei, Z., Farkas, A., Mikulass, K.,  
911 Nagy, A., and Tiricz, H. 2010. Plant peptides govern terminal differentiation of bacteria in  
912 symbiosis. *Science* 327:1122-1126.

- 913 Varma Penmetsa, R., Uribe, P., Anderson, J., Lichtenzveig, J., Gish, J.-C., Nam, Y.W., Engstrom, E., Xu, K.,  
914 Sckisel, G., Pereira, M., Baek, J.M., Lopez-Meyer, M., Long, S.R., Harrison, M.J., Singh, K.B., Kiss,  
915 G.B., and Cook, D.R. 2008. TheMedicago truncatulaortholog of Arabidopsis EIN2,sickle, is a  
916 negative regulator of symbiotic and pathogenic microbial associations. *The Plant Journal* 55:580-  
917 595.
- 918 Verdier, J., Torres-Jerez, I., Wang, M., Andriankaja, A., Allen, S.N., He, J., Tang, Y., Murray, J.D., and  
919 Udvardi, M.K. 2013. Establishment of the Lotus japonicus Gene Expression Atlas (LjGEA) and its  
920 use to explore legume seed maturation. *The Plant Journal* 74:351-362.
- 921 Vernie, T., Moreau, S., de Billy, F., Plet, J., Combier, J.P., Rogers, C., Oldroyd, G., Frugier, F., Niebel, A., and  
922 Gamas, P. 2008a. EFD Is an ERF transcription factor involved in the control of nodule number and  
923 differentiation in *Medicago truncatula*. *Plant Cell* 20:2696-2713.
- 924 Vernie, T., Moreau, S., de Billy, F., Plet, J., Combier, J.P., Rogers, C., Oldroyd, G., Frugier, F., Niebel, A., and  
925 Gamas, P. 2008b. EFD Is an ERF Transcription Factor Involved in the Control of Nodule Number  
926 and Differentiation in *Medicago truncatula*. *The Plant Cell Online* 20:2696-2713.
- 927 Wang, D., Griffitts, J., Starker, C., Fedorova, E., Limpens, E., Ivanov, S., Bisseling, T., and Long, S. 2010. A  
928 nodule-specific protein secretory pathway required for nitrogen-fixing symbiosis. *Science*  
929 327:1126-1129.
- 930 Yano, K., Yoshida, S., Müller, J., Singh, S., Banba, M., Vickers, K., Markmann, K., White, C., Schuller, B., and  
931 Sato, S. 2008. CYCLOPS, a mediator of symbiotic intracellular accommodation. *Proceedings of the*  
932 *National Academy of Sciences* 105:20540-20545.
- 933 Yano, K., Shibata, S., Chen, W.L., Sato, S., Kaneko, T., Jurkiewicz, A., Sandal, N., Banba, M.,  
934 Imaizumi-Anraku, H., and Kojima, T. 2009. CERBERUS, a novel U-box protein containing WD-40  
935 repeats, is required for formation of the infection thread and nodule development in the legume–  
936 *Rhizobium* symbiosis. *The Plant Journal* 60:168-180.
- 937 Ye, J., Fang, L., Zheng, H., Zhang, Y., Chen, J., Zhang, Z., Wang, J., Li, S., Li, R., and Bolund, L. 2006. WEGO: a  
938 web tool for plotting GO annotations. *Nucleic acids research* 34:W293-W297.
- 939 Yendrek, C.R., Lee, Y.-C., Morris, V., Liang, Y., Pislariu, C.I., Burkart, G., Meckfessel, M.H., Salehin, M.,  
940 Kessler, H., Wessler, H., Lloyd, M., Lutton, H., Teillet, A., Sherrier, D.J., Journet, E.-P., Harris, J.M.,  
941 and Dickstein, R. 2010. A putative transporter is essential for integrating nutrient and hormone  
942 signaling with lateral root growth and nodule development in *Medicago truncatula*. *The Plant*  
943 *Journal* 62:100-112.

944 Yokota, K., Fukai, E., Madsen, L.H., Jurkiewicz, A., Rueda, P., Radutoiu, S., Held, M., Hossain, M.S.,  
945 Szczyglowski, K., and Morieri, G. 2009. Rearrangement of actin cytoskeleton mediates invasion of  
946 Lotus japonicus roots by Mesorhizobium loti. The Plant Cell 21:267-284.

947 Yoon, H.J., Hossain, M.S., Held, M., Hou, H., Kehl, M., Tromas, A., Sato, S., Tabata, S., Andersen, S.U.,  
948 Stougaard, J., Ross, L., and Szczyglowski, K. 2014. Lotus japonicus SUNERGOS1 encodes a  
949 predicted subunit A of a DNA topoisomerase VI that is required for nodule differentiation and  
950 accommodation of rhizobial infection. The Plant Journal 78:811-821.

951 Yuan, S., Zhu, H., Gou, H., Fu, W., Liu, L., Chen, T., Ke, D., Kang, H., Xie, Q., Hong, Z., and Zhang, Z. 2012. A  
952 Ubiquitin Ligase of Symbiosis Receptor Kinase Involved in Nodule Organogenesis. Plant physiology  
953 160:106-117.

954

955

956

957

958

959

960

961

962

963

964

965
